## 24 **Summary**

25           Spatially distant areas of cerebral cortex coordinate their activity into networks  
26 that are integral to cognitive processing. A common structural motif of cortical networks  
27 is co-activated frontal and posterior cortical regions. Knowledge of the neural circuit  
28 mechanisms underlying such widespread inter-areal cortical coordination is lacking.  
29 Using anesthetized mouse functional magnetic resonance imaging (fMRI) we  
30 discovered that mouse frontal cortical functional connectivity reflects the common  
31 cortical network motif in its functional connectivity to posterior cortices, but also  
32 demonstrates significant functional connectivity with the claustrum. Exploring whether  
33 the claustrum may synaptically support such network architecture, we used a  
34 channelrhodopsin-assisted electrophysiological circuit mapping approach to assess the  
35 strength of synaptic connectivity of 35 unique frontal cortico-claustral-cortical  
36 connections through 1,050 subtype-identified claustrum projection neurons. We  
37 observed significant trans-claustral synaptic connectivity from the anterior cingulate  
38 cortex and prelimbic prefrontal cortex back to originating frontal cortical regions as well  
39 as to posteriorly-lying visual and parietal association cortices contralaterally. The  
40 infralimbic prefrontal cortex possessed significant trans-claustral synaptic connectivity  
41 with the posteriorly-lying retrosplenial cortex, but to a far lesser degree with visual and  
42 parietal association cortices. These data reveal discrete extended cortical pathways  
43 through the claustrum that are positioned to support cortical network motifs central to  
44 cognitive control functions.

45

46

47

## 48 **Introduction**

49           The transfer of executive cortical information through subcortical structures that  
50 lead back to cortex is essential for cognition and the implementation of complex  
51 behavioral strategies (Rafal and Posner et al., 1987; Kraft et al., 2015; Voytek and  
52 Knight et al., 2010; Thompson et al., 1987, Packard and Knowlton 2002; Houk et al.,  
53 2007; Seger 2006). Such classical extended cortical systems include cortico-basal  
54 ganglia-cortical and cortico-thalamo-cortical loops. Delineating the specific directionality  
55 of flow of information through these multi-synaptic pathways has proven critical to  
56 advancing our understanding of their functional attributes (Sherman and Guillery 2002;  
57 Sherman 2017; Albin 1989; Bostan 2018; Aoki et al., 2019).

58           An understudied, yet significant, projection system emanating largely from frontal  
59 cortices also routes to the subcortical nucleus the claustrum. The claustrum (White and  
60 Mu et al., 2020; Atlan et al., 2018) and its frontal cortical input (White et al., 2018a) are  
61 required for optimal performance during cognitively demanding tasks. In humans, the  
62 claustrum is activated during execution of difficult, but not easy, versions of the multi-  
63 source interference attention task, which occurs coincidentally with the emergence of  
64 task-positive cortical networks such as the fronto-parietal network (FPN) (Krimmel et al.,  
65 2019b). The FPN, along with the default mode network of task-negative cortical areas,  
66 are also functionally connected with the claustrum at rest (Krimmel et al., 2019b; Barrett  
67 et al., 2020). Given that cortical networks are initiated by frontal cortical regions (Grent-  
68 't-Jong and Woldorff et al., 2007), and cognitive control processes originate in frontal  
69 cortices (Botvinick, 2001; Shenhav, 2013; Miller and Buschman et al., 2007), the

70 claustrum is positioned as a subcortical structure that may support cortical networks  
71 through discrete cortico-claustrum-cortical pathways.

72 While evidence exists supporting claustrum functional connectivity with the  
73 salience network in rat (Smith, 2019) and a degree of synaptic connectivity to support  
74 this (Chia et al., 2020), further investigation of how the claustrum may provide a circuit  
75 mechanism supporting cortical network motifs composed of frontal and posterior cortical  
76 regions, such as task-positive and task-negative networks, is lacking. Characterizing a  
77 circuit mechanism supporting network communication may provide critical insight into  
78 myriad neuropsychiatric disorders in which the loss of network integrity predicts  
79 cognitive dysfunction, including addiction (Costumero et al., 2018), depression  
80 (Sylvester et al., 2013), and schizophrenia (Cole et al., 2011; Sheffield et al., 2015).

81 We analyzed the resting state functional connectivity (rsFC) of five frontal cortical  
82 seed regions of interest using mouse functional magnetic resonance imaging (fMRI)  
83 data to assess for claustrum functional connectivity. Testing the possible structural and  
84 synaptic connectivity underlying the functional connectivity observed using this  
85 approach, we examined 35 unique frontal cortico-claustral-cortical circuits using  
86 synaptic circuit mapping across 1,050 claustrum projection neurons of two  
87 physiologically distinct subtypes (White et al., 2018b). These data reveal distinct,  
88 primary information pathways through the claustrum reflecting a motif common in  
89 cortical networks underlying cognition.

90

## 91 **Results**

### 92 **Mouse fMRI reveals rsFC between frontal cortical regions and claustrum**

93 Both task-positive and task-negative networks are composed of specific frontal  
94 and posterior cortical regions. For example, the task-positive fronto-parietal network is  
95 composed of the cingulate cortex, dorsolateral prefrontal cortex, and posterior parietal  
96 cortex in humans (Sturm and Willmes et al., 2001; Chadick et al., 2011; Ptak, 2011;  
97 Hugdahl et al., 2015). The task-negative default mode network includes the  
98 ventromedial prefrontal cortex and posterior cingulate cortex (Raichle et al., 2001; Uddin  
99 et al., 2009). Previous imaging data reveal that such anti-correlated networks are  
100 conserved, to an extent, across rodents (Whitesell et al., 2021; Lu et al., 2012). Since  
101 cortical networks are initiated by their frontal cortical components (Grent-'t-Jong and  
102 Woldorff et al., 2007), we sought to examine the functional connectivity of a host of well-  
103 characterized frontal regions in mice including anterior cingulate cortex (ACC), prelimbic  
104 prefrontal cortex (plPFC), infralimbic prefrontal cortex (ilPFC), the orbitofrontal cortex  
105 (OFC) and anterior insular cortex (aINS). Assessing whether these cortical areas  
106 possess functional connectivity with the claustrum we used a publicly available fMRI  
107 dataset ([https://public.data.donders.ru.nl/dcmn/DSC\\_4180000.18\\_502\\_v1](https://public.data.donders.ru.nl/dcmn/DSC_4180000.18_502_v1)) acquired at  
108 9.4 T (n = 51 mice). Following selection of unilateral (left) ROIs for all five frontal seed  
109 regions (Figure 1A), resting state functional connectivity (rsFC) maps for each frontal  
110 cortex seed exhibited significantly connected voxels surviving a conservative voxel-wise  
111 correction for multiple comparisons (FWE  $p < 0.05$ ) within bilateral claustrum (CL)  
112 regions (Figure 1B-G). In addition, significantly connected voxels were also observed in  
113 posterior cortical regions, including the retrosplenial cortex (RSC), parietal association  
114 cortex (PtA), and visual cortex (V1/V2) (Figure 1H).

115

## 116 **Clastrum projection neuron subtypes differ by firing properties and morphology**

117           Functional connectivity analyses reveal voxels with timeseries significantly  
118 correlated with the seed region, and functional connectivity often reflects anatomical  
119 features (Greicius et al., 2009; Gordon et al., 2017). However, functional and anatomical  
120 connectivity do not necessarily correspond nor can be definitively interpreted as  
121 evidence of a direct influence of one brain region on another (Friston, 2011).  
122 Consequently, the rsFC data, while suggestive, do not allow conclusions regarding  
123 underlying synaptic connections nor cellular subtype specificity. We therefore  
124 investigated the strength of synaptic connectivity in distinct cortico-claustrum-cortical  
125 circuits originating in the frontal cortex seed regions that target ipsilaterally back to the  
126 five frontal cortical regions as well as to the posterior cortical network regions identified  
127 in our rsFC data maps (Figure 1H).

128           Previous work suggested the existence of two potential projection neuron  
129 subtypes in the claustrum (White et al., 2018b). To confirm this, we sought to  
130 distinguish these neurons by both electrophysiological and morphological data. To do  
131 this, mice of both sexes received bilateral injections of an anterograde GFP-expressing  
132 virus (AAV5-hSyn-eGFP) in the ACC to outline the anatomical boundary of the  
133 claustrum of both hemispheres (White et al., 2018b). We recorded from claustrum  
134 projection neurons within the GFP-marked claustrum boundaries using a biocytin-filled  
135 internal recording solution to create three-dimensional reconstructions of the recorded  
136 neurons (Figure 2A). The identification of each claustrum projection neuron was  
137 determined based on burst-firing properties (Figure 2B): “type II” claustrum projection  
138 neurons burst fire following a brief 2ms depolarizing voltage step whereas “type I”

139 neurons do not (White et al., 2018b). Following Sholl analysis of the reconstructed  
140 claustrum neurons, type II neurons exhibited a significantly greater dendritic length and  
141 number of dendritic intersections than type I neurons (Figure 2C). The increased  
142 number of intersections appeared in higher branch order numbers (Figure 2D). While  
143 type II gross dendritic morphology was more complex than that of type I neurons, type I  
144 neurons exhibited greater dendritic spine density compared to type II neurons (Figure  
145 2E). Since both projection neuron subtypes significantly differed on physiological and  
146 morphological grounds, we heretofore tested each neuronal subtype for differences in  
147 cortico-claustrum-cortical connectivity.

148

#### 149 **Structural connectivity suggest multiple frontal cortico-claustral-cortical circuits**

##### 150 **exist**

151 We next endeavored to test 35 possible frontal cortico-claustrum-cortical circuits  
152 through both claustrum projection neuron subtypes based on our five input regions and  
153 seven output regions (Figure 3A). We bilaterally injected an anterograde eYFP virus  
154 (AAV5-hSyn-ChR2-eYFP) into various frontal cortical regions (Figure 3B), including the  
155 ACC (Figure S1A), pIPFC (Figure S1B), iIPFC (Figure S1C), OFC (Figure S1D), and  
156 aINS (Figure S1E). A retrograde tdTomato virus (AAVrg-CAG-tdTomato) was also  
157 injected bilaterally in either the ACC (Figure S1F), pIPFC (Figure S1G), iIPFC (Figure  
158 S1H), OFC (Figure S1I), aINS (Figure S1J), PtA (Figure S1K), V1/V2 (Figure S1L), and  
159 RSC (Figure S1M) to observe overlap between anterograde and retrograde labeling  
160 within the claustrum. We observed dense terminal anterograde expression throughout  
161 the rostral-caudal axis of the claustrum from the ACC (Figure S1A), pIPFC (Figure

162 S1B), and ilPFC (Figure S1C). Moderate eYFP expression was observed in the  
163 claustrum following bilateral injections in the OFC (Figure S1D) and sparse labeling was  
164 observed from the aINS in the claustrum (Figure S1E). Inputs arising from parietal  
165 sensory regions were not tested since optical stimulation from sensory cortices fails to  
166 elicit significant neuronal depolarization in claustrum projection neurons (White et al.,  
167 2018a). We found the fluorescent retrogradely labelled cell bodies in the claustrum  
168 targeted the ACC (Figure S1F), pIPFC (Figure S1G), ilPFC (Figure S1H), OFC (Figure  
169 S1I), PtA (Figure S1K), V1/V2 (Figure S1L), and RSC (Figure S1M). We found no cells  
170 labelled in the claustrum following retrograde viral injections in the aINS (Figure 2I),  
171 which confirms the claustrum weakly projects to this area (Qadir et al., 2018).

172

### 173 **Synaptic circuit mapping reveals distinct cortico-claustro-cortical circuits**

174 To determine whether the structural connections observed indeed form  
175 synaptically-connected cortico-claustro-cortical pathways – and to what degree of  
176 strength they form - we used a channelrhodopsin-assisted long-range circuit mapping  
177 approach. We injected anterogradely transported AAV5-hSyn-ChR2-eYFP in each of  
178 the frontal cortical seed regions used previously (Figures 1 and 3): ACC, pIPFC, ilPFC,  
179 OFC, and aINS. Retrogradely labeled tdTomato-positive claustrum projection neurons  
180 were recorded using whole-cell patch clamp for each cortico-claustro-cortical circuit  
181 (Figure 3A). Each neuron was first categorized as a type I or II claustrum neuron based  
182 on their action potential firing response to a brief depolarizing voltage step (Figure 2B).

183 Based on the area under the synaptic response curve (AUC) (Figure 4) and  
184 action potentials (APs) per light pulse synaptic strength metrics (Figure 5), we



185 discovered four distinct frontal cortico-claustrum cortical circuits that terminated back on  
186 the originating cortical area on the contralateral side (e.g., left ACC > CL > right ACC)  
187 we termed “homoloquial circuits”. These circuits include ACC > CL > ACC (AUC = type  
188 I:  $980.57 \pm 234.03$  mV\*msec, APs/light pulse =  $0.20 \pm 0.09$ ; type II:  $1888.64 \pm 621.51$   
189 mV\*msec,  $0.55 \pm 0.21$ ) (Figure 3C,4A,5A); pIPFC > CL > pIPFC (type I:  $829.25 \pm$   
190  $283.61$  mV\*msec,  $0.10 \pm 0.0$ ; type II:  $1397.84 \pm 400.05$  mV\*ms,  $0.30 \pm 0.14$ ) (Figure  
191 3D,4A,5A); iIPFC > CL > iIPFC (type I:  $418.33 \pm 82.48$  mV\*msec,  $0.06 \pm 0.03$ ; type II:  
192  $1521.39 \pm 379.03$  mV\*msec,  $0.32 \pm 0.11$ ) (Figure 3E,4A,5A); and OFC > CL > OFC  
193 (type I:  $334.97 \pm 56.41$  mV\*msec,  $0.00 \pm 0.00$ , type II:  $576.29 \pm 143.41$  mV\*msec,  $0.02$   
194  $\pm 0.01$ ) (Figure 3F,4A,5A). An aINS homoloquial circuit was not tested as we found no  
195 claustrum neurons projecting to the aINS (Figure S1E).

196 The other 31 circuits tested were circuits where inputs originate in frontal cortices  
197 and synapse onto claustrum neurons that project ipsilaterally to a different cortical area  
198 from the originating frontal cortical region (termed “heteroloquial circuits”). ACC-  
199 originating heteroloquial circuits (Figure 3C,4A,5A) include: ACC > CL > pIPFC (type I:  
200  $0.11 \pm 0.06$ ,  $1726.36 \pm 500.26$  mV\*msec; type II:  $0.55 \pm 0.23$ ,  $2283.24 \pm 718.96$   
201 mV\*msec); ACC > CL > iIPFC (type I:  $0.03 \pm 0.01$ ,  $874.50 \pm 158.12$  mV\*msec; type II:  
202  $0.52 \pm 0.18$ ,  $1630.08 \pm 437.59$  mV\*msec); ACC > CL > OFC (type I:  $0.00 \pm 0.00$ ,  $365.18$   
203  $\pm 97.84$  mV\*msec; type II:  $0.14 \pm 0.09$ ,  $1092.71 \pm 369.7$  mV\*msec); ACC > CL > RSC  
204 (type I:  $0.11 \pm 0.05$ ,  $543.90 \pm 100.59$  mV\*msec; type II:  $0.13 \pm 0.07$ ,  $1018.83 \pm 228.81$   
205 mV\*msec); ACC > CL > PtA (type I:  $0.19 \pm 0.10$ ,  $1605.65 \pm 499.74$  mV\*msec; type II:  
206  $0.48 \pm 0.22$ ,  $1846.68 \pm 611.11$  mV\*msec); and ACC > CL > V1/V2 (type I:  $0.14 \pm 0.08$ ,  
207  $1187.82 \pm 339.33$  mV\*msec; type II:  $0.46 \pm 0.18$ ,  $1387.44 \pm 427.60$  mV\*msec).

208           The pIPFC-originating heteroloquial circuits (Figure 3D,4A,5A) include: pIPFC >  
209 CL > ACC (type I:  $0.11 \pm 0.07$ ,  $1110.11 \pm 329.41$  mV\*msec; type II:  $0.26 \pm 0.12$ ,  
210  $1448.17 \pm 422.10$  mV\*msec); pIPFC > CL > ilPFC (type I:  $0.00 \pm 0.00$ ,  $-126.12 \pm 75.50$   
211 mV\*msec; type II:  $0.00 \pm 0.00$ ,  $257.79 \pm 33.61$  mV\*msec); pIPFC > CL > OFC (type I:  
212  $0.04 \pm 0.02$ ,  $910.73 \pm 253.03$  mV\*msec; type II:  $0.05 \pm 0.03$ ,  $711.19 \pm 171.64$   
213 mV\*msec); pIPFC > CL > RSC (type I:  $0.00 \pm 0.00$ ,  $-5.03 \pm 37.58$  mV\*msec; type II:  
214  $0.02 \pm 0.01$ ,  $904.83 \pm 172.07$  mV\*msec); pIPFC > CL > PtA (type I:  $0.40 \pm 0.15$ ,  $2857.86$   
215  $\pm 1006.19$  mV\*msec; type II:  $0.70 \pm 0.26$ ,  $2698.31.15 \pm 997.09$  mV\*msec); and pIPFC >  
216 CL > V1/V2 (type I:  $0.36 \pm 0.12$ ,  $2063.42 \pm 642.18$  mV\*msec; type II:  $1.04 \pm 0.36$ ,  
217  $2963.15 \pm 972.68$  mV\*msec).

218           The ilPFC-originating heteroloquial circuits (Figure 3E,4A,5A) include: ilPFC > CL  
219 > ACC (type I:  $0.00 \pm 0.00$ ,  $90.03 \pm 10.76$  mV\*msec, type II:  $0.00 \pm 0.00$ ,  $393.51 \pm$   
220  $55.72$ ); ilPFC > CL > pIPFC (type I:  $0.00 \pm 0.00$ ,  $-87.94 \pm 34.25$  mV\*msec; type II:  $0.01 \pm$   
221  $0.00$ ,  $367.92 \pm 66.75$  mV\*msec); ilPFC > CL > OFC (type I:  $0.02 \pm 0.01$ ,  $921.15 \pm$   
222  $214.65$  mV\*msec; type II:  $0.09 \pm 0.03$ ,  $646.72 \pm 141.09$  mV\*msec); ilPFC > CL > RSC  
223 (type I:  $0.10 \pm 0.04$ ,  $948.56 \pm 203.32$  mV\*msec; type II:  $0.78 \pm 0.38$ ,  $3024.88 \pm 900.08$   
224 mV\*msec); ilPFC > CL > PtA (type I:  $0.01 \pm 0.01$ ,  $425.83 \pm 69.29$  mV\*msec; type II:  $0.09$   
225  $\pm 0.04$ ,  $1208.80 \pm 261.53$  mV\*msec); and ilPFC > CL > V1/V2 (type I:  $0.01 \pm 0.01$ ,  
226  $585.93 \pm 95.61$  mV\*msec; type II:  $0.07 \pm 0.03$ ,  $974.24 \pm 205.79$  mV\*msec).

227           The OFC-originating heteroloquial circuits (Figure 3F,4A,5A) include: OFC > CL  
228 > ACC (type I:  $0.00 \pm 0.00$ ,  $558.56 \pm 120.27$  mV\*msec; type II:  $0.01 \pm 0.01$ ,  $645.47 \pm$   
229  $158.26$  mV\*msec); OFC > CL > pIPFC (type I:  $0.00 \pm 0.00$ ,  $391.55 \pm 72.17$  mV\*msec;  
230 type II:  $0.01 \pm 0.01$ ,  $496.05 \pm 103.38$  mV\*msec); OFC > CL > ilPFC (type I:  $0.00 \pm 0.00$ ,

231  $437.82 \pm 79.15$  mV\*msec;  $0.00 \pm 0.00$ ,  $590.06 \pm 118.20$  mV\*msec); OFC > CL > RSC  
232 (type I:  $0.01 \pm 0.00$ ,  $260.83 \pm 40.83$  mV\*msec, type II:  $0.11 \pm 0.06$ ,  $1006.56 \pm 288.62$   
233 mV\*msec); OFC > CL > PtA (type I:  $0.00 \pm 0.00$ ,  $318.96 \pm 51.90$  mV\*msec; type II:  $0.02$   
234  $\pm 0.01$ ,  $495.16 \pm 158.10$ ); and OFC > CL > V1/V2 (type I:  $0.00 \pm 0.00$ ,  $514.24 \pm 135.05$   
235 mV\*msec; type II:  $0.01 \pm 0.01$ ,  $634.90 \pm 218.70$  mV\*msec).

236 Lastly, the aINS-originating heteroloquial circuits (Figure 3G,4A,5A) include:  
237 aINS > CL > ACC (type I:  $0.00 \pm 0.00$ ,  $133.14 \pm 24.28$  mV\*msec; type II:  $0.00 \pm 0.00$ ,  
238  $137.10 \pm 14.48$  mV\*msec); aINS > CL > pIPFC (type I:  $0.00 \pm 0.00$ ,  $126.87 \pm 25.88$   
239 mV\*msec; type II:  $0.00 \pm 0.00$ ,  $114.51 \pm 23.34$  mV\*msec); aINS > CL > ilPFC (type I:  
240  $0.00 \pm 0.00$ ,  $361.20 \pm 66.63$  mV\*msec; type II:  $0.00 \pm 0.00$ ,  $196.16 \pm 21.01$ ); aINS > CL  
241 > OFC (type I:  $0.00 \pm 0.00$ ,  $170.44 \pm 20.30$  mV\*msec; type II:  $0.00 \pm 0.00$ ,  $222.86 \pm$   
242  $21.19$ ); aINS > CL > RSC (type I:  $0.00 \pm 0.00$ ,  $259.51 \pm 46.23$  mV\*msec; type II:  $0.00 \pm$   
243  $0.00$ ,  $257.16 \pm 44.34$  mV\*msec); aINS > CL > PtA (type I:  $0.00 \pm 0.00$ ,  $261.55 \pm 54.64$   
244 mV\*msec; type II:  $0.00 \pm 0.00$ ,  $273.46 \pm 93.64$  mV\*msec); and aINS > CL > V1/V2 (type  
245 I:  $0.00 \pm 0.00$ ,  $97.69 \pm 21.15$  mV\*msec; type II:  $0.00 \pm 0.00$ ,  $150.73 \pm 18.56$  mV\*msec).  
246 All seven aINS-originating circuits contained neurons that failed to elicit observable  
247 postsynaptic responses in the claustrum.

248

249 **Cortico-claustral synaptic strength depends on claustrum neuron subtype and**  
250 **postsynaptic target**

251 We next applied a subgraph extraction-based cluster analysis to determine  
252 whether any group of circuits in this cortico-claustral-cortical circuit electrophysiological  
253 dataset emerge as statistically grouped to be physiologically relevant. Applying a

254 permutation test with a significant p-value set at  $\leq 0.001$ , we detected a subgraph of  
255 circuits that originate in the ACC and pIPFC for both type I (Fig. 4B, 5B) and type II (Fig.  
256 4C, 5C) neurons. Based on the average AUC metric the statistically significant clustered  
257 type I circuits include: ACC > CL > pIPFC [Cohen's D value = 1.66]; ACC > CL > PtA  
258 [2.23]; ACC > CL > V1/V2 [2.28]; pIPFC > CL > pIPFC [2.29]; pIPFC > CL > PtA [3.25];  
259 and pIPFC > CL > V1/V2 [2.48]. AUC clustered type II circuits include: ACC > CL > ACC  
260 [2.24]; ACC > CL > pIPFC [2.62]; ACC > CL > PtA [1.92]; ACC > CL > V1/V2 [2.49];  
261 pIPFC > CL > ACC [2.60]; pIPFC > CL > pIPFC [2.47]; pIPFC > CL > PtA [3.91]; and  
262 pIPFC > CL > V1/V2 [2.75]. Based on the average APs/light pulse metric the statistically  
263 significant clustered type I circuits include: ACC > CL > PtA [1.09]; ACC > CL > V1/V2  
264 [0.85]; pIPFC > CL > PtA [1.94]; and pIPFC > CL > V1/V2 [1.27]. APs/light pulse  
265 clustered type II circuits include: ACC > CL > ACC [1.65]; ACC > CL > pIPFC [1.66];  
266 ACC > CL > PtA [1.46]; ACC > CL > V1/V2 [1.45]; pIPFC > CL > ACC [0.93]; pIPFC >  
267 CL > PtA [1.46]; and pIPFC > CL > V1/V2 [2.00]. Notably, while iIPFC > CL > RSC (Fig.  
268 4A,5A) exhibited connectivity, it did not reach statistical significance for clustering into  
269 ACC- and pIPFC-originating circuits.

270         Based on the cluster analysis results, pIPFC- and ACC-originating circuits, which  
271 both display cortico-claustrum-cortical connectivity with V1/V2 and PtA, are statistically  
272 related. This contrasted with iIPFC-originating circuits that displayed weak connections  
273 to PtA and V1/V2 -projecting claustrum neurons (Figures 4 and 5). Instead, iIPFC  
274 connects significantly with RSC-projecting claustrum neurons, particularly through type  
275 II claustrum neurons. Extending this disparity pIPFC activation induces hyperpolarizing  
276 response in claustrum neurons projecting to the iIPFC-favored target region the RSC

277 and to claustrum projection neurons targeting ilPFC itself (Figure 4a). Further, ilPFC  
278 activation induces hyperpolarizing responses in pIPFC-projecting claustrum neurons.

279 Lastly, we compared the postsynaptic responses of type I versus type II neurons  
280 for each of the 35 circuits tested (Figure 5D). To account for burst firing properties of  
281 type II neurons, we transformed the data into binary responses (0 = no action potentials  
282 and 1 = at least one action potential). Using this metric, we discovered a total of 10  
283 circuits in which type II neurons significantly fired more than type I neurons: ACC > CL >  
284 ACC (type I:  $0.28 \pm 0.06$ , type II:  $0.51 \pm 0.07$ ); ACC > CL > pIPFC (type I:  $0.14 \pm 0.05$ ,  
285 type II:  $0.50 \pm 0.05$ ); ACC > CL > ilPFC (type I:  $0.05 \pm 0.04$ , type II:  $0.36 \pm 0.19$ ), ACC >  
286 CL > PtA (type I:  $0.23 \pm 0.06$ , type II:  $0.41 \pm 0.05$ ); ACC > CL > V1/V2 (type I:  $0.19 \pm$   
287  $0.05$ , type II:  $0.41 \pm 0.06$ ); ACC > CL > OFC (type I:  $0.00 \pm 0.00$ , type II:  $0.13 \pm 0.04$ );  
288 pIPFC > CL > V1/V2 (type I:  $0.38 \pm 0.08$ , type II:  $0.58 \pm 0.05$ ); ilPFC > CL > ilPFC (type  
289 I:  $0.10 \pm 0.06$ , type II:  $0.36 \pm 0.08$ ); ilPFC > CL > RSC (type I:  $0.16 \pm 0.06$ , type II:  $0.41 \pm$   
290  $0.06$ ); and OFC > CL > RSC (type I:  $0.02 \pm 0.02$ , type II:  $0.17 \pm 0.05$ ). Most circuits that  
291 preferentially drove AP firing in type II neurons over type I neurons were from ACC-  
292 originating circuits. No circuits tested preferentially activated type I neurons significantly  
293 more than type II neurons.

294

## 295 **Discussion**

296 Mouse fMRI revealed frontal cortical region functional connectivity with claustrum  
297 and with posterior sensory and association cortices, suggesting underlying synaptic  
298 connectivity. Channelrhodopsin-assisted circuit mapping experiments uncovered two  
299 types of cortico-claustro-cortical circuits: homoloquial circuits that originate from frontal

300 cortical regions and relay back to frontal regions and heteroloquial circuits that originate  
301 in frontal cortices and relay to posterior sensory regions. We found that the two  
302 physiologically distinct subtypes of claustrum projection neurons, which are also  
303 morphologically distinct, differentially support trans-claustral cortico-claustrum-cortical  
304 circuits. However, frontal cortical inputs onto claustrum projections differ in strength  
305 depending on the output region of a given claustrum neuron regardless of subtype. For  
306 example, pIPFC > CL > PtA, pIPFC > CL > V1/V2, ACC > CL > pIPFC, and iIPFC > CL  
307 > RSC circuits are significantly stronger than all other ACC-, pIPFC-, and iIPFC-  
308 originating circuits as well as all OFC- and aINS-originating circuits tested. These data  
309 indicate that the claustrum is synaptically configured to allow for flow of information from  
310 frontal cortices back to frontal cortices, as well as to posterior cortices, in a circuit- and  
311 cell-type-specific manner that reflects whole-brain imaging functional connectivity data.

312 Like basal ganglia and thalamic structures, the present data describe an  
313 extended cortical system involving significant cortical input to a subcortical nucleus –  
314 the claustrum - that returns processed information back to cortex. The primary  
315 difference with the basal ganglia and thalamic nuclei, however, is that the claustrum  
316 provides input back not only to originating frontal cortical nuclei, but to geographically  
317 distant areas from frontal cortices, including parietal cortical structures. Higher-order  
318 thalamic structures such as the pulvinar, lateral posterior nuclei, and mediodorsal  
319 nuclei, receive converging input from layer 5/6 prefrontal and sensory cortical projection  
320 neurons (Collins et al., 2018; Groh et al., 2014), which in turn propagate incoming  
321 signals back to superficial layers 2/3 of the prefrontal cortex (Collins et al., 2018). This

322 contrasts with the claustrum, which projects to layers 2/3, 5 and 6 in frontal cortices  
323 (Jackson et al., 2018; White et al., 2018b).

324         The common claustrum-cortical input to both frontal and posterior cortices  
325 positions this structure to coordinate inter-areal cortical activity. Indeed, Narikiyo and  
326 colleagues (Narikiyo et al., 2020) showed that mouse claustrum activation synchronizes  
327 cortical activity. Thus, the major extended cortical communications network revealed  
328 herein, together with findings that the claustrum is functionally connected with human  
329 cortical networks (Krimmel et al., 2019b; Barrett et al., 2020), supports the notion that  
330 the claustrum may be a central subcortical support system for cortical network function.  
331 Moreover, psilocybin, an agonist of serotonin 2A receptors, which are highly expressed  
332 in claustrum (Pazos et al., 1985), disrupts claustrum activity, cortical network integrity,  
333 and claustrum functional connectivity with cortical networks in human subjects (Barrett  
334 et al., 2020).

335         In addition to the significant cluster of ACC and pIPFC projections that innervated  
336 claustrum neurons that, in turn, project to visual cortices and PtA, we found that the  
337 iIPFC > CL > RSC pathway through predominantly type II neurons was robust. This  
338 strongly contrasts with our pIPFC > CL > RSC results where most RSC-projecting  
339 claustrum neurons hyperpolarized in response to pIPFC afferent stimulation. This stark  
340 synaptic connectivity contrast between iIPFC- and pIPFC-driving circuits, may suggest  
341 that the claustrum supports discrete network states. Considering that human task-  
342 positive and task-negative cortical networks are anti-correlated (Fox et al., 2005; Uddin  
343 et al., 2009; Riemer et al., 2020), and that iIPFC and RSC are identified as two major  
344 putative nodes of the default mode network in mouse (Stafford et al., 2014), whereas

345 the plPFC and PtA are putative mouse homologs of major nodes in the human fronto-  
346 parietal network (Hwang, 2021; Laubach et al., 2018), the present data may support the  
347 idea of the claustrum acting as a relay system sculpting defined cortical networks.

348 Our data suggest that the claustrum differentially relays frontal cortical signals in  
349 a claustrum projection neuron subtype-dependent manner. For example, we found that  
350 inputs arising from the ACC preferentially activate type II neurons significantly more  
351 than type I neurons. Although further work is needed to define the functional  
352 significance of these pathways, we speculate that since synchronized rhythms are a  
353 major hallmark of networks (Buschman et al., 2012), an executive cortical structure may  
354 “jump-start” specific networks states through the burst-firing properties of type II  
355 claustrum neurons. This notion fits with recent data showing claustrum neuron  
356 ensembles not being modulated by “bottom up” sensory inputs, but rather, are  
357 synchronized to preferring contralateral licks in a sensory selection task (Chevéé et al.,  
358 2022). Given the transient firing nature of claustrum projection neurons (White et al.,  
359 2018b) and the ability for single claustrum neurons to project to multiple functionally  
360 related brain regions (Marriott et al., 2020), the claustrum may function to switch, but not  
361 maintain, cortical network states upon cognitive demand. This is supported by the  
362 finding that significant claustrum activation is observed when task-negative networks  
363 diminish and task-positive networks emerge at the beginning of a complex cognitive  
364 task (Krimmel et al., 2019b).

365 The present findings do not rule out the existence of other cortico-claustro-  
366 cortical or sub-cortical-claustro-cortical pathways. However, considering that the  
367 majority of input to the claustrum is cortical, and of that the majority arises from the



368 frontal cortices (Wang et al., 2018), the present results highlight what is likely the bulk of  
369 information flow through claustrum. While the connections defined here support cortical  
370 network motif architectures, they also suggest that frontal cortical areas may  
371 communicate with one another through the claustrum, perhaps for dynamic control of  
372 downstream network states. Taken together with the thalamic nuclei and cortico-cortical  
373 connections that support putative default mode network connectivity in mouse  
374 (Whitesell et al., 2021), the cortical source, claustrum cell type-, and cortical target-  
375 specific pathways defined here all likely cooperate to support cortical network states for  
376 optimal cognitive performance.

377

378

379

380

381

382

383

384

385

386

387

388

389 **References**

- 390 Albin, R. L., Young, A. B., & Penney, J. B. (1989). The functional anatomy of basal  
391 ganglia disorders. *Trends in neurosciences*, 12(10), 366–375.
- 392 Alves, P. N., Foulon, C., Karolis, V., Bzdok, D., Margulies, D. S., Volle, E., & Thiebaut  
393 de Schotten, M. (2019). An improved neuroanatomical model of the default-mode  
394 network reconciles previous neuroimaging and neuropathological findings.  
395 *Communications biology*, 2, 370.
- 396 Aoki, S., Smith, J. B., Li, H., Yan, X., Igarashi, M., Coulon, P., Wickens, J. R., Ruigrok,  
397 T. J., & Jin, X. (2019). An open cortico-basal ganglia loop allows limbic control over  
398 motor output via the nigrothalamic pathway. *eLife*, 8, e49995.
- 399 Atlan, G., Terem, A., Peretz-Rivlin, N., Sehwat, K., Gonzales, B. J., Pozner, G.,  
400 Tasaka, G. I., Goll, Y., Refaeli, R., Zviran, O., et al. (2018). The Claustrum  
401 Supports Resilience to Distraction. *Current biology: CB*, 28(17), 2752–2762.e7.
- 402 Barrett, F. S., Krimmel, S. R., Griffiths, R. R., Seminowicz, D. A., & Mathur, B. N.  
403 (2020). Psilocybin acutely alters the functional connectivity of the claustrum with  
404 brain networks that support perception, memory, and attention. *NeuroImage*, 218,  
405 116980.
- 406 Bostan AC, Dum RP, Strick PL. Functional Anatomy of Basal Ganglia Circuits with the  
407 Cerebral Cortex and the Cerebellum. *Prog Neurol Surg*. 2018;33:50-61.
- 408 Botvinick, M. M., Braver, T. S., Barch, D. M., Carter, C. S., & Cohen, J. D. (2001).  
409 Conflict monitoring and cognitive control. *Psychological review*, 108(3), 624–652.

- 410 Buschman, T. J., & Miller, E. K. (2007). Top-down versus bottom-up control of attention  
411 in the prefrontal and posterior parietal cortices. *Science (New York, N. Y.)*,  
412 315(5820), 1860–1862.
- 413 Buschman, T. J., Denovellis, E. L., Diogo, C., Bullock, D., & Miller, E. K. (2012).  
414 Synchronous oscillatory neural ensembles for rules in the prefrontal  
415 cortex. *Neuron*, 76(4), 838–846.
- 416 Carman, J. B., Cowan, W. M., and Powell, T. P. (1964). The cortical projection upon the  
417 claustrum. *J. Neurol. Neurosurg. Psychiatry* 27, 46–51.
- 418 Chadick, J. Z., & Gazzaley, A. (2011). Differential coupling of visual cortex with default  
419 or frontal-parietal network based on goals. *Nature neuroscience*, 14(7), 830–832.  
420 <https://doi.org/10.1038/nn.2823>
- 421 Chevée, M., Finkel, E. A., Kim, S. J., O'Connor, D. H., & Brown, S. P. (2022). Neural  
422 activity in the mouse claustrum in a cross-modal sensory selection task. *Neuron*,  
423 110(3), 486–501.e7.
- 424 Chia, Z., Augustine, G. J., & Silberberg, G. (2020). Synaptic Connectivity between the  
425 Cortex and Claustrum Is Organized into Functional Modules. *Current biology : CB*,  
426 30(14), 2777–2790.e4.
- 427 Cole MW, Anticevic A, Repovs G, Barch D (2011). Variable global dysconnectivity and  
428 individual differences in schizophrenia. *Biol Psychiatry*. 70(1):43-50.
- 429 Collins DP, Anastasiades PG, Marlin JJ, Carter AG. Reciprocal Circuits Linking the  
430 Prefrontal Cortex with Dorsal and Ventral Thalamic Nuclei. *Neuron*. 2018 Apr

- 431 18;98(2):366-379.e4. doi: 10.1016/j.neuron.2018.03.024.
- 432 Costumero, V., Rosell-Negre, P., Bustamante, J. C., Fuentes-Claramonte, P., Llopis, J.  
433 J., Ávila, C., & Barrós-Loscertales, A. (2018). Left frontoparietal network activity is  
434 modulated by drug stimuli in cocaine addiction. *Brain imaging and behavior*, 12(5),  
435 1259–1270.
- 436 Fakhraei, L., Francoeur, M., Balasubramani, P. P., Tang, T., Hulyalkar, S., Buscher, N.,  
437 Mishra, J., & Ramanathan, D. S. (2021). Electrophysiological Correlates of Rodent  
438 Default-Mode Network Suppression Revealed by Large-Scale Local Field Potential  
439 Recordings. *Cerebral cortex communications*, 2(2).
- 440 Fox MD, Snyder AZ, Vincent JL, Corbetta M, Van Essen DC, Raichle ME. The human  
441 brain is intrinsically organized into dynamic, anticorrelated functional networks.  
442 Proc Natl Acad Sci U S A. 2005 Jul 5;102(27):9673-8.
- 443 Franklin, K., & Paxinos, G. (2008). The Mouse Brain in Stereotaxic Coordinates,  
444 Compact: The Coronal Plates and Diagrams. Academic Press.
- 445 Friston K. J. (2011). Functional and effective connectivity: a review. *Brain connectivity*,  
446 1(1), 13–36.
- 447 Grandjean, J., Azzinnari, D., Seuwen, A., Sigrist, H., Seifritz, E., Pryce, C. R., & Rudin,  
448 M. (2016). Chronic psychosocial stress in mice leads to changes in brain functional  
449 connectivity and metabolite levels comparable to human depression. *NeuroImage*,  
450 142, 544–552.
- 451 Greicius, M. D., Supekar, K., Menon, V., & Dougherty, R. F. (2009). Resting-state

- 452 functional connectivity reflects structural connectivity in the default mode  
453 network. *Cerebral cortex (New York, N.Y. : 1991)*, 19(1), 72–78.
- 454 Grent-'t-Jong, T., & Woldorff, M. G. (2007). Timing and sequence of brain activity in top-  
455 down control of visual-spatial attention. *PLoS biology*, 5(1), e12.
- 456 Gordon, E. M., Laumann, T. O., Gilmore, A. W., Newbold, D. J., Greene, D. J., Berg, J.  
457 J., Ortega, M., Hoyt-Drazen, C., Gratton, C., Sun, H., Hampton, J. M., Coalson, R.  
458 S., Nguyen, A. L., McDermott, K. B., Shimony, J. S., Snyder, A. Z., Schlaggar, B.  
459 L., Petersen, S. E., Nelson, S. M., & Dosenbach, N. (2017). Precision Functional  
460 Mapping of Individual Human Brains. *Neuron*, 95(4), 791–807.e7.
- 461 Groh, A., Bokor, H., Mease, R. A., Plattner, V. M., Hangya, B., Stroh, A., Deschenes,  
462 M., & Acsády, L. (2014). Convergence of cortical and sensory driver inputs on  
463 single thalamocortical cells. *Cerebral cortex (New York, N.Y. : 1991)*, 24(12), 3167–  
464 3179.
- 465 Halassa, M. M., & Sherman, S. M. (2019). Thalamocortical Circuit Motifs: A General  
466 Framework. *Neuron*, 103(5), 762–770.
- 467 Harrison, B. J., Pujol, J., López-Solà, M., Hernández-Ribas, R., Deus, J., Ortiz, H.,  
468 Soriano-Mas, C., Yücel, M., Pantelis, C., & Cardoner, N. (2008). Consistency and  
469 functional specialization in the default mode brain network. *Proceedings of the*  
470 *National Academy of Sciences of the United States of America*, 105(28), 9781–  
471 9786.
- 472 Helfrich RF, Fiebelkorn IC, Szczepanski SM, Lin JJ, Parvizi J, Knight RT, Kastner S  
473 (2018). Neural Mechanisms of Sustained Attention Are Rhythmic. *Neuron*.

474 99(4):854-865.e5.

475 Houk, J. C., Bastianen, C., Fansler, D., Fishbach, A., Fraser, D., Reber, P. J., Roy, S.  
476 A., & Simo, L. S. (2007). Action selection and refinement in subcortical loops  
477 through basal ganglia and cerebellum. *Philosophical transactions of the Royal*  
478 *Society of London. Series B, Biological sciences*, 362(1485), 1573–1583.

479 Hugdahl, K., Raichle, M. E., Mitra, A., & Specht, K. (2015). On the existence of a  
480 generalized non-specific task-dependent network. *Frontiers in human*  
481 *neuroscience*, 9, 430.

482 Hwang, E. J., Sato, T. R., & Sato, T. K. (2021). A Canonical Scheme of Bottom-Up and  
483 Top-Down Information Flows in the Frontoparietal Network. *Frontiers in neural*  
484 *circuits*, 15, 691314.

485 Jackson, J., Karnani, M. M., Zemelman, B. V., Burdakov, D., & Lee, A. K. (2018).  
486 Inhibitory Control of Prefrontal Cortex by the Claustrum. *Neuron*, 99(5), 1029–  
487 1039.e4.

488 Kawasaki M, Kitajo K, Yamaguchi Y (2014). Fronto-parietal and fronto-temporal theta  
489 phase synchronization for visual and auditory-verbal working memory. *Front*  
490 *Psychol.* 5:200.

491 Kraft, A., Irlbacher, K., Finke, K., Kaufmann, C., Kehrler, S., Liebermann, D., Bundesen,  
492 C., & Brandt, S. A. (2015). Dissociable spatial and non-spatial attentional deficits  
493 after circumscribed thalamic stroke. *Cortex; a journal devoted to the study of the*  
494 *nervous system and behavior*, 64, 327–342.

- 495 Krimmel, S. R., Qadir, H., Hesselgrave, N., White, M. G., Reser, D. H., Mathur, B. N., &  
496 Seminowicz, D. A. (2019a). Resting State Functional Connectivity of the Rat  
497 Claustrum. *Frontiers in neuroanatomy*, *13*, 22.
- 498 Krimmel, S. R., White, M. G., Panicker, M. H., Barrett, F. S., Mathur, B. N., &  
499 Seminowicz, D. A. (2019b). Resting state functional connectivity and cognitive task-  
500 related activation of the human claustrum. *NeuroImage*, *196*, 59–67.
- 501 Lu, H., Zou, Q., Gu, H., Raichle, M. E., Stein, E. A., & Yang, Y. (2012). Rat brains also  
502 have a default mode network. *Proceedings of the National Academy of Sciences of*  
503 *the United States of America*, *109*(10), 3979–3984.
- 504 Marriott, B. A., Do, A. D., Zahacy, R., & Jackson, J. (2021). Topographic gradients  
505 define the projection patterns of the claustrum core and shell in mice. *The Journal*  
506 *of comparative neurology*, *529*(7), 1607–1627.
- 507 Mandino, F., Vrooman, R. M., Foo, H. E., Yeow, L. Y., Bolton, T., Salvan, P., Teoh, C.  
508 L., Lee, C. Y., Beauchamp, A., Luo, S., Bi, R., Zhang, J., Lim, G., Low, N., Sallet,  
509 J., Gigg, J., Lerch, J. P., Mars, R. B., Olivo, M., Fu, Y., ... Grandjean, J. (2021). A  
510 triple-network organization for the mouse brain. *Molecular psychiatry*,  
511 10.1038/s41380-021-01298-5. Advance online publication.
- 512 Mathur B. N. (2014). The claustrum in review. *Frontiers in systems neuroscience*, *8*, 48.  
513 <https://doi.org/10.3389/fnsys.2014.00048>
- 514 Medaglia, J. D., Lynall, M. E., & Bassett, D. S. (2015). Cognitive network neuroscience.  
515 *Journal of cognitive neuroscience*, *27*(8), 1471–1491.

- 516 Menon V, Uddin LQ (2010). Saliency, switching, attention and control: a network model  
517 of insula function. *Brain Struct Funct.* 214(5-6):655-67.
- 518 Narikiyo, K., Mizuguchi, R., Ajima, A., Shiozaki, M., Hamanaka, H., Johansen, J. P.,  
519 Mori, K., & Yoshihara, Y. (2020). The claustrum coordinates cortical slow-wave  
520 activity. *Nature neuroscience*, 23(6), 741–753.
- 521 Ouhaz, Z., Fleming, H., & Mitchell, A. S. (2018). Cognitive Functions and  
522 Neurodevelopmental Disorders Involving the Prefrontal Cortex and Mediodorsal  
523 Thalamus. *Frontiers in neuroscience*, 12, 33.
- 524 Packard, M. G., & Knowlton, B. J. (2002). Learning and memory functions of the Basal  
525 Ganglia. *Annual review of neuroscience*, 25, 563–593.
- 526 Pazos, A., Cortés, R., & Palacios, J. M. (1985). Quantitative autoradiographic mapping  
527 of serotonin receptors in the rat brain. II. Serotonin-2 receptors. *Brain research*,  
528 346(2), 231–249.
- 529 Petreanu L, Huber D, Sobczyk A, Svoboda K (2007). Channelrhodopsin-2-assisted  
530 circuit mapping of long-range callosal projections. *Nat Neurosci.* 10(5):663-8.
- 531 Ptak R. (2012). The frontoparietal attention network of the human brain: action,  
532 saliency, and a priority map of the environment. *The Neuroscientist : a review*  
533 *journal bringing neurobiology, neurology and psychiatry*, 18(5), 502–515.
- 534 Qadir H, Krimmel SR, Mu C, Pouloupoulos A, Seminowicz DA, Mathur BN (2018).  
535 Structural Connectivity of the Anterior Cingulate Cortex, Claustrum, and the  
536 Anterior Insula of the Mouse. *Front Neuroanat.* 12:100.



- 537 Raichle, M. E., MacLeod, A. M., Snyder, A. Z., Powers, W. J., Gusnard, D. A., &  
538 Shulman, G. L. (2001). A default mode of brain function. *Proceedings of the*  
539 *National Academy of Sciences of the United States of America*, 98(2), 676–682.
- 540 Rafal, R. D., & Posner, M. I. (1987). Deficits in human visual spatial attention following  
541 thalamic lesions. *Proceedings of the National Academy of Sciences of the United*  
542 *States of America*, 84(20), 7349–7353.
- 543 Riemer, F., Grüner, R., Beresniewicz, J., Kazimierczak, K., Erslund, L., & Hugdahl, K.  
544 (2020). Dynamic switching between intrinsic and extrinsic mode networks as  
545 demands change from passive to active processing. *Scientific reports*, 10(1),  
546 21463.
- 547 Seger C. A. (2006). The basal ganglia in human learning. *The Neuroscientist : a review*  
548 *journal bringing neurobiology, neurology and psychiatry*, 12(4), 285–290.
- 549 Sheffield JM, Repovs G, Harms MP, Carter CS, Gold JM, et al. (2015) Fronto-parietal  
550 and cingulo-opercular network integrity and cognition in health and schizophrenia.  
551 *Neuropsychologia*. 73:82-93.
- 552 Shenhav, A., Botvinick, M. M., & Cohen, J. D. (2013). The expected value of control: an  
553 integrative theory of anterior cingulate cortex function. *Neuron*, 79(2), 217–240.
- 554 Sherk, H. (1986). “The claustrum and the cerebral cortex,” in *Cerebral Cortex*, eds E. G.  
555 Jones and A. Peters (Vol. 5), (New York: Plenum Press), 467–499.
- 556 Sherman, S. M., & Guillery, R. W. (2002). The role of the thalamus in the flow of  
557 information to the cortex. *Philosophical transactions of the Royal Society of*

- 558 *London. Series B, Biological sciences*, 357(1428), 1695–1708.
- 559 Sherman S. M. (2017). Functioning of Circuits Connecting Thalamus and Cortex.  
560 *Comprehensive Physiology*, 7(2), 713–739.
- 561 Smith, J. B., Watson, G., Liang, Z., Liu, Y., Zhang, N., & Alloway, K. D. (2019). A Role  
562 for the Claustrum in Salience Processing?. *Frontiers in neuroanatomy*, 13, 64.
- 563 Stafford, J. M., Jarrett, B. R., Miranda-Dominguez, O., Mills, B. D., Cain, N., Mihalas, S.,  
564 Lahvis, G. P., Lattal, K. M., Mitchell, S. H., David, S. V., Fryer, J. D., Nigg, J. T., &  
565 Fair, D. A. (2014). Large-scale topology and the default mode network in the mouse  
566 connectome. *Proceedings of the National Academy of Sciences of the United*  
567 *States of America*, 111(52), 18745–18750.
- 568 Sylvester, C. M., Barch, D. M., Corbetta, M., Power, J. D., Schlaggar, B. L., & Luby, J.  
569 L. (2013). Resting state functional connectivity of the ventral attention network in  
570 children with a history of depression or anxiety. *Journal of the American Academy*  
571 *of Child and Adolescent Psychiatry*, 52(12), 1326–1336.e5.
- 572 Thompson, R., Huestis, P. W., & Yu, J. (1987). Motor learning: nonspecific subcortical  
573 mechanisms in rats. *Archives of physical medicine and rehabilitation*, 68(7), 419–  
574 422
- 575 Uddin, L. Q., Kelly, A. M., Biswal, B. B., Castellanos, F. X., & Milham, M. P. (2009).  
576 Functional connectivity of default mode network components: correlation,  
577 anticorrelation, and causality. *Human brain mapping*, 30(2), 625–637.
- 578 Vincent, J. L., Kahn, I., Snyder, A. Z., Raichle, M. E., & Buckner, R. L. (2008). Evidence

- 579 for a frontoparietal control system revealed by intrinsic functional connectivity.  
580 *Journal of neurophysiology*, 100(6), 3328–3342.
- 581 Voytek, B., & Knight, R. T. (2010). Prefrontal cortex and basal ganglia contributions to  
582 visual working memory. *Proceedings of the National Academy of Sciences of the*  
583 *United States of America*, 107(42), 18167–18172
- 584 Wang, Q., Ng, L., Harris, J. A., Feng, D., Li, Y., Royall, J. J., Oh, S. W., Bernard, A.,  
585 Sunkin, S. M., Koch, C., & Zeng, H. (2017). Organization of the connections  
586 between claustrum and cortex in the mouse. *The Journal of comparative neurology*,  
587 525(6), 1317–1346.
- 588 White, M. G., Cody, P. A., Bubser, M., Wang, H. D., Deutch, A. Y., and Mathur, B. N.  
589 (2017). Cortical hierarchy governs rat claustrrocortical circuit organization. *J. Comp.*  
590 *Neurol.* 525, 1347–1362.
- 591 White MG, Mathur BN. 2018a. Anterior Cingulate Cortex Input to the Claustrum Is  
592 Required for Top-Down Action Control. *Cell Rep.* 2018 Jan 2;22(1):84-95. doi:  
593 10.1016/j.celrep.2017.12.023
- 594 White MG, Mathur BN. 2018b. Frontal cortical control of posterior sensory and  
595 association cortices through the claustrum. *Brain Struct Funct.* Jul;223(6):2999-  
596 3006.
- 597 White, M. G., Mu, C., Qadir, H., Madden, M. B., Zeng, H., & Mathur, B. N. (2020). The  
598 Mouse Claustrum Is Required for Optimal Behavioral Performance Under High  
599 Cognitive Demand. *Biological psychiatry*, 88(9), 719–726.

600 Whitesell, J. D., Liska, A., Coletta, L., Hirokawa, K. E., Bohn, P., Wakeman, W... Harris,  
601 J. A. (2021). Regional, Layer, and Cell-Type-Specific Connectivity of the Mouse  
602 Default Mode Network. *Neuron*, 109(3), 545–559.e8.

### 603 **Materials and methods**

604 Animals: 5 C57BL/6J (wild type) mice of both sexes were used for neuron 3D  
605 reconstruction experiments. 40 wild-type mice were used for circuit histology  
606 experiments. 175 wild-type mice were used for all *ex vivo* channelrhodopsin circuit  
607 mapping whole-cell patch clamp experiments (5 mice per circuit). Mice used for all *ex*  
608 *vivo* experiments were 12-16 weeks of age and were group-housed with food and water  
609 available *ad libitum* and on a 12 hour day/night light cycle beginning at 07:00 and all  
610 patch-clamp experiments were performed during the light cycle. This study was  
611 performed in accordance with the National Institutes of Health Guide for Care and Use  
612 of Laboratory Animals and the University of Maryland, School of Medicine, Animal Care  
613 and Use Committee.

614

615 Stereotaxic Procedures and Viral vectors: Mice were anesthetized via inhalation of 3.5%  
616 isoflurane and placed in a mouse stereotaxic frame while anesthesia was maintained  
617 with 1% isoflurane inhalation. A stereotaxic drill was used to drill small openings in the  
618 mouse skull above brain regions prior to viral injection. 250nl of an anterograde adeno-  
619 associated virus (AAV) vector expressing a green fluorescent protein under the *hSyn*  
620 (human synapsin) promoter (AAV5-hSyn-eGFP; Addgene) was injected into ACC to  
621 fluorescently mark the anatomical boundary of the claustrum (White et al., 2017, Qadir

622 et al., 2018) in order to cell fill spiny claustrum projection neurons for 3D reconstruction  
623 analysis. Relative to bregma, the coordinates used for ACC injections were anterior-  
624 posterior (AP): +1.0mm, medial-lateral (ML):  $\pm$  0.3mm, dorsal-ventral (DV): -1.1mm. For  
625 all CRACM slice electrophysiology experiments, 200nL injections into the input nucleus  
626 were performed bilaterally using an AAV vector expressing channelrhodopsin (AAV5-  
627 hSyn-ChR2-eYFP; Addgene) and simultaneously injected 150nL of a retrograde AAV  
628 expressing a td Tomato tag under the CAG (chicken beta-actin) promoter (rgAAV-CAG-  
629 td tomato; Addgene) (Tervo et al., 2016) into the output nucleus to fluorescently label  
630 claustrum projection neurons projecting to the target region. Exactly 4 weeks of virus  
631 incubation was given before mice were euthanized and brain slices were taken for *ev*  
632 *vivo* cellular recordings. Coordinates for the following brain regions were used for  
633 CRACM experiments: ACC: (see above); pIPFC: (AP = +2.0mm, ML =  $\pm$ 0.4mm, DV = -  
634 1.2mm); iIPFC: (AP = +1.78, ML =  $\pm$ 0.3mm, DV = -2.2mm) OFC: (AP = +2.6mm, ML =  
635  $\pm$ 1.1mm, DV = -1.8mm); aINS: (AP = +1.94mm, ML =  $\pm$ 2.5mm, DV = -3.5mm); PtA: (AP  
636 = -1.9mm, ML =  $\pm$ 1.4mm, DV = -0.4mm); V1/V2: (AP = -2.9mm, ML =  $\pm$ 2.05mm, DV = -  
637 0.4mm); RSC: (AP = -1.6mm, ML =  $\pm$ 0.3mm, DV = -0.5mm). DV coordinates were  
638 measure from top of brain surface.

639

640 Histology: Mice were overdosed on isoflurane gas and perfused with room temperature  
641 0.1M phosphate-buffered solution (PBS), pH 7.3, and then with ice-cold 4%  
642 paraformaldehyde (PFA) solution in PBS, 10 days after viral injection surgery. After  
643 extraction, the brains were post-fixed in 4% PFA solution overnight. 50  $\mu$ m thickness  
644 slices were obtained using the Integraslice 7550 MM vibrating microtome (Campden

645 Instruments, Loughborough, England), and were stored at 4°C in 0.1M PBS. The slices  
646 were mounted onto 25 x 75 x 1 mm frosted microscope slides (Thermo-Scientific,  
647 Waltham, MA, United States) using 125 uL ProLong Gold antifade reagent (Invitrogen)  
648 as the mountant. The slides were imaged using a Nikon fluorescence microscope  
649 (Nikon, Minato, Tokyo, Japan) with images obtained using both 4X and 10X  
650 magnification objectives.

651

652 Resting State Functional Connectivity fMRI analysis: Mouse resting state fMRI data was  
653 obtained from a publicly available dataset  
654 ([https://public.data.donders.ru.nl/dcmn/DSC\\_4180000.18\\_502\\_v1](https://public.data.donders.ru.nl/dcmn/DSC_4180000.18_502_v1),  
655 [https://public.data.donders.ru.nl/dcmn/DSC\\_4180000.18\\_502\\_v1/LICENSE.txt](https://public.data.donders.ru.nl/dcmn/DSC_4180000.18_502_v1/LICENSE.txt)). The  
656 specific data used consisted of scans from an experiment testing the effects of a model  
657 of psychosocial stress on male, wild-type, C57BL/6 mice aged 3 months (Grandjean et  
658 al., 2016). We therefore used only pre-intervention baseline scans from all 51 animals,  
659 both control and experimental, available online.

660 Full details on data acquisition are described in (Grandjean et al., 2016). Briefly,  
661 anesthesia was induced with 3.5% isoflurane, mice were ventilated at 80 breaths per  
662 minute, and anesthesia was maintained with a combination of pancuronium bromide,  
663 medetomidine, and a gradual reduction to 0.5% isoflurane. Scans were acquired with a  
664 Bruker 94/30 Biospec spectrometer (Bruker BioSpin MRI, Ettlingen, Germany) operating  
665 at 9.4 T. Resting state fMRI scans consisted of 6 minutes of blood oxygenation level-  
666 dependent (BOLD) gradient-echo echo planar images acquired using repetition time TR  
667 = 1000 ms, echo time TE = 9.2 ms, flip angle FA = 90°, matrix size MS = 90 x 70, field

668 of view FOV = 20 × 17.5 mm<sup>2</sup>, slice number NS = 12, slice thickness ST = 0.5 mm, slice  
669 gap SG = 0.2 mm, and bandwidth BW = 250,000 Hz.

670 Full details on preprocessing are described in (Mandino et al., 2021). Briefly,  
671 anatomical images were registered to the Allen Institute for Brain Science (AIBS) mouse  
672 template (<https://atlas.brain-map.org/>). Functional images were despiked (*3dDespike*),  
673 motion-corrected (*3dvolreg*), corrected for B1 field, denoised, brain-masked, registered  
674 linearly to corresponding anatomical images, and band-pass filtered (*3dBandpass*,  
675 0.01–0.25 Hz).

676 The five unilateral frontal cortical seed regions of interest (ROIs) and the  
677 contralateral claustrum were drawn using FSLEyes. For each ROI, the AIBS template  
678 used for preprocessing was loaded in the software, an empty 3D mask with the same  
679 dimensions was generated and overlaid on the template, and the voxels of the ROI  
680 were hand-selected using the anatomical knowledge of the authors, Paxinos and  
681 Franklin's the Mouse Brain in Stereotaxic Coordinates, Compact (2008), and anatomical  
682 landmarks visible in the AIBS template. The seed and claustrum ROIs as drawn can be  
683 seen in Fig. 1a.

684 Analyses were performed in SPM12. To assess whole brain functional  
685 connectivity of the seed regions, the SPM toolbox MarsBar was used to extract each  
686 animal's mean BOLD signal timeseries from each seed ROI, and individual General  
687 Linear Models were produced in SPM for each animal/ROI consisting of the mean ROI  
688 timeseries and 6 motion parameters as regressors.

689 To determine significant functional connectivity, one sample t-tests were  
690 performed on resting state second-level contrast maps masked with the AIBS template  
691 binary mask. To correct for multiple comparisons, we imposed an FWE-corrected voxel-  
692 wise significance threshold of  $p < 0.05$ . Data are publicly available, and code and ROI  
693 files are available upon request.

694 Following the synaptic connectivity experiments, 3 contralateral output ROIs –  
695 RSC, PtA, and visual cortex - were drawn in FSL using the same process used for the  
696 unilateral input and claustrum ROIs described above. SPM's ImCalc function was used  
697 to generate separate images representing the overlap of one of these output ROIs or  
698 the claustrum ROI and the FWE  $p < 0.05$  rsFC maps for ACC, pIPFC, and iIPFC input  
699 regions. Images of input region rsFC overlap with claustrum and contralateral output  
700 regions in Fig. 6b-d were generated by overlaying the AIBS mouse brain template, an  
701 input region rsFC map, and corresponding claustrum and output region overlap images  
702 in FSL.

703

704 3D reconstruction: Type I and type II claustrum projection neurons were recorded under  
705 whole-cell current clamp conditions. Respective neurons were recorded with a  
706 potassium-based solution (290-295 mOsm; pH) with 5% concentration biocytin to allow  
707 for proper cell fill into the soma and distal dendrites. Immediately following  
708 electrophysiological recording, slices were fixed in 4% paraformaldehyde overnight at  
709 4°C. The next day, slices were washed in 0.1 M phosphate buffered saline (PBS) 3 x 20  
710 min and blocked with 1% bovine serum albumin (BSA) in PBS + 0.3% Triton X-100  
711 (PBS-T) for 2 h at room temperature. Slices were incubated with Alexa Fluor 594-



712 streptavidin (Invitrogen, #S32356) (1:1000, 1% BSA in 0.3% PBS-T) overnight at 4°C.  
713 The next day, slices were washed in PBS 3 x 20 min, mounted on slides, and  
714 coverslipped in ProLong Diamond Antifade (Invitrogen, #P36965).

715 Confocal images were acquired with a Nikon A1 microscope equipped with 488  
716 and 561 lasers. For neuronal reconstructions, slices were first imaged for both GFP and  
717 Alexa Fluor 594 expression to verify the position of each neuron within the claustrum.  
718 Neurons were then imaged using a 40x (0.95 NA) objective with a lateral resolution of  
719 0.310  $\mu\text{m}$  per pixel and a 0.727  $\mu\text{m}$  z-step. For dendritic spine reconstruction and  
720 quantification, two dendrites were imaged per cell using a 100x (1.46 NA) oil-immersion  
721 objective with a lateral resolution of 0.05  $\mu\text{m}$  per pixel and a 0.10  $\mu\text{m}$  z-step. Dendrites  
722 were randomly chosen, taking care to avoid broken or proximal (<50  $\mu\text{m}$  from cell body)  
723 sections, and a roughly 50  $\mu\text{m}$  section was imaged for analysis. Prior to spine analysis,  
724 raw images were denoised using the Nikon Elements Denoise.ai algorithm.

725 Semi-automated neuronal reconstruction was performed using NeuroLucida 360  
726 (version 2020.1.1) with directional kernels algorithm. Dendritic spine analysis was  
727 conducted using a semi-automated analysis method using Biplane Imaris (version  
728 9.5.1). The Filaments module was used to first reconstruct sections of dendrite then  
729 detect spines. Spine detection was edited for accuracy when necessary by an  
730 experimenter blind to cell type.

731

732 Ex vivo brain slice preparation for slice electrophysiology: Mice between the ages of 5-8  
733 weeks were surgically injected with both viruses bilaterally and following four weeks of

734 virus incubation were euthanized for *ex vivo* recordings. Following anesthetization, mice  
735 were decapitated, and the brains were extracted. 250  $\mu\text{m}$  coronal sections were sliced  
736 using a Leica VT1200 vibrating microtome in a high-sucrose artificial cerebrospinal fluid  
737 (aCSF) solution. The high-sucrose cutting aCSF solution was kept ice cold,  
738 continuously bubbled with carbogen (95%  $\text{O}_2$ , 5%  $\text{CO}_2$ ), and was comprised of 194 mM  
739 sucrose, 30 mM NaCl, 4.5 mM KCl, 1 mM  $\text{MgCl}_2$ , 26 mM  $\text{NaHCO}_3$ , 1.2 mM  $\text{NaH}_2\text{PO}_4$ ,  
740 and 10 mM D-glucose. Sections were incubated after slicing for 30 min at 33  $^\circ\text{C}$  in  
741 carbogen-bubbled aCSF (315–320 mOsm) that contained 124 mM NaCl, 4.5 mM KCl, 2  
742 mM  $\text{CaCl}_2$ , 1 mM  $\text{MgCl}_2$ , 26 mM  $\text{NaHCO}_3$ , 1.2 mM  $\text{NaH}_2\text{PO}_4$ , and 10 mM D-glucose.  
743 Brain slices were incubated at room temperature until whole-cell patch-clamp  
744 recordings, and patch recordings were performed in the same aCSF formulation used  
745 for incubation.

746

747 Whole-cell current clamp recordings: Whole-cell recordings were performed at 29–31  $^\circ\text{C}$   
748 using borosilicate glass recording pipettes of 3–7  $\text{M}\Omega$  resistance. For recordings  
749 performed in a current clamp configuration, recording pipettes were filled with a  
750 potassium-based solution (290–295 mOsm; pH 7.3) composed of 126 mM potassium  
751 gluconate, 4 mM KCl, 10 mM HEPES, 4 mM ATP-Mg, 0.3 mM GTP-Na and 10 mM  
752 phosphocreatine. Clampex software (Version 10.4; Molecular Devices) was used for all  
753 electrophysiological recordings. Recordings were filtered at 2 kHz and digitized at 10  
754 kHz using MultiClamp 700B software (Molecular Devices). Claustrum projection neuron  
755 type was determined via a 5 ms depolarization step while recording in current-clamp  
756 mode to determine burst firing properties (Type I: no burst fire; Type II: burst fire).

757 Following this protocol, membrane capacitance values were also recorded to confirm  
758 the characterization of neuron type (Type I: ~75-130 pF; Type II: ~130-200 pF) (White et  
759 al., 2018). For all CRACM experiments, three 5ms 470nm blue light pulses with 150ms  
760 intervals were given to evoke presynaptic transmitter release while recording from  
761 fluorescently labeled claustrum projections (Petreanu et al., 2007).

762 Circuit mapping data analysis and statistics: Three 5ms light pulses were  
763 delivered to optically stimulate ChR2-expressing glutamatergic afferents arising from a  
764 given cortical region to drive postsynaptic responses. To quantify the degree of the  
765 postsynaptic response in each circuit, we used: 1) average action potentials (APs) per  
766 light stimulation intensity and 2) area under the curve (AUC) for each postsynaptic  
767 recording trace. For AUC, a higher positive AUC value represents a postsynaptic  
768 depolarization, reflecting an excitatory postsynaptic potential (EPSP) or an AP.  
769 Conversely, a negative AUC value reflects a postsynaptic hyperpolarization. Notably,  
770 using the same potassium-based internal solution used throughout, we found that the  
771 reversal potential for inhibitory synaptic currents at both type I and II neuron synapses  
772 was -75mV (Figure S2A-C). Electrophysiology data were analyzed using Clampex  
773 software (version 11.0.3). Area under the curve values were converted from voltage  
774 values for each trace in Clampex data table files into excel files. Values for each circuit,  
775 cell, and light intensity were analyzed using MatLab (version 2019a) using trapezoidal  
776 integration for area under the curve to access activation/inactivation of each cell  
777 following presynaptic stimulation. Representative heatmaps were averaged using  
778 Microsoft excel and plotted in MatLab. Multiple comparison statistical analyses were  
779 performed using GraphPad Prism software (Prism 8). Subgraph extraction analyses

780 was performed by determining the p-value of a subgraph through the probability to  
781 obtain the subgraph under the null hypothesis that none of the circuits and edges are  
782 significant (approximated by permutation test). Cohen's d values for all the data points  
783 were calculated using MatLab.

784

785

786

787

788

789

790

791

792

793

794

795

796

797

798

799 **Figure legends**

800 **Figure 1. Frontal cortex seeds exhibit resting state functional connectivity (rsFC)**  
801 **with the claustrum.**

802 A) Sagittal (left), coronal (middle), and axial (right) views of unilateral anterior cingulate  
803 cortex (ACC), prelimbic prefrontal cortex (pIPFC), infralimbic prefrontal cortex (ilPFC)  
804 orbitofrontal cortex (OFC), and anterior insular cortex (aINS) seed ROIs as drawn  
805 overlaid on the Allen Institute for Brain Science (AIBS) mouse template. B) Coronal  
806 slices displaying the rostro-caudal extent of the contralateral claustrum ROI overlaid on  
807 the AIBS mouse template. Slices correspond to those over which the rsFC heat maps of  
808 C) ACC, D) pIPFC, E) ilPFC, F) OFC, and G) aINS are displayed (multiple comparisons-  
809 corrected voxel-wise FWE  $p < 0.05$ ). Color bars indicate t-statistic values. White arrows  
810 indicate regions of rsFC overlap with contralateral claustrum. H) Coronal slices  
811 displaying claustrum with parietal cortices including retrosplenial cortex (RSC), parietal  
812 association cortex (PtA), and visual cortex (V1/V2).

813

814 **Figure 2. Type II spiny claustrum projection neurons dendritic morphology is**  
815 **more complex than Type I neurons.** A) Top: Representative cell fill 3D reconstructions  
816 of Type I claustrum projection neurons. Bottom: Representative cell fill 3D  
817 reconstructions of Type II claustrum projection neurons (n=10 cells shown for each  
818 subtype). B) Top: Type I claustrum projection neuron delineated by lack of burst-firing  
819 following 2ms depolarization voltage step. Representative voltage trace following  
820 current-injection ramp. Bottom: Type II claustrum projection neuron delineated by  
821 presence of burst-firing following 2ms depolarization voltage step. Representative

822 voltage trace following current-injection ramp. C) Type II claustrum neurons have  
823 increased number of dendritic intersections and increased dendrite length (Kruskal-  
824 Wallis test:  $P < 0.0001$ ; Type I:  $n = 11$  cells; Type II:  $n = 12$  cells). D) Type II neurons have  
825 increased number of intersections of higher branch order numbers (two-way ANOVA:  
826  $F(13,308) = 3.97$ ,  $P < 0.0001$ , Bonferroni post hoc:  $P < 0.01$ ). E) Type I neurons have  
827 increased number of spines per  $\mu\text{m}$  of dendrite (unpaired-t test,  $P = 0.008$ ). Vertical scale  
828 bars: A)  $100\mu\text{m}$  B) current ramp:  $200\text{pA}$ . Horizontal scale bars: A)  $100\mu\text{m}$  B)  $200\mu\text{m}$ .

829

830 **Figure 3. Functional channelrhodopsin-assisted circuit mapping of fronto-**

831 **claustrum-cortical circuits** A) Left: illustration of viral set up for structural circuit mapping  
832 method. AAV5-hSyn-ChR2-eYFP injected into the input cortical nucleus for anterograde  
833 terminal labeling and AAVrg-CAG-tdTomato injected in output cortical nucleus for  
834 retrograde soma labeling in claustrum. Right: representative image of fluorescently  
835 labeled spiny claustrum projection neurons for fluorescence-guided slice recordings. B)  
836 Cartoon diagram of all 35 fronto-claustrum-cortical circuits tested with 5 input frontal  
837 cortical regions and 7 output regions. C) Top: Diagram of *ex vivo* ACC trans-claustrum  
838 circuits tested (projecting to ACC, pIPFC, iIPFC, OFC, RSC, PtA, and V1/V2 cortices  
839 respectively) and corresponding representative voltage traces for recorded type I and II  
840 claustrum neurons. Bottom: Heatmaps depicting average change in membrane potential  
841 across each recording trace following each light pulse stimulation (blue marker) for type  
842 I and II claustrum neurons. Only recordings with maximum light intensity ( $3\text{mW}$ ) are  
843 shown. Circuits tested: ACC > CL > ACC; ACC > CL > pIPFC; ACC > CL > iIPFC; ACC  
844 > CL > OFC; ACC > CL > RSC; ACC > CL > PtA; ACC > CL > V1/V2 ( $n = 15$  type I cells;

845 n=15 type II cells each circuit). D) Diagram of *ex vivo* pIPFC trans-claustral circuits  
846 tested (projecting to pIPFC, ACC, iIPFC, OFC, RSC, PtA, and V1/V2 cortices  
847 respectively) and corresponding representative voltage traces for recorded type I and II  
848 claustrum neurons. Circuits tested: pIPFC > CL > pIPFC; pIPFC > CL > ACC; pIPFC >  
849 CL > iIPFC; pIPFC > CL > OFC; pIPFC > CL > RSC; pIPFC > CL > PtA; pIPFC > CL >  
850 V1/V2 (n=15 type I cells; n=15 type II cells each circuit). E) Diagram of *ex vivo* iIPFC  
851 trans-claustral circuits tested (projecting to iIPFC, ACC, pIPFC, OFC, RSC, PtA, and  
852 V1/V2 cortices respectively) and corresponding representative voltage traces for  
853 recorded type I and II claustrum neurons. Circuits tested: iIPFC > CL > iIPFC; iIPFC > CL  
854 > ACC; iIPFC > CL > pIPFC; iIPFC > CL > OFC; iIPFC > CL > RSC; iIPFC > CL > PtA;  
855 iIPFC > CL > V1/V2 (n=15 type I cells; n=15 type II cells each circuit). F) Diagram of *ex*  
856 *vivo* OFC trans-claustral circuits tested (projecting to OFC, ACC, pIPFC, iIPFC, RSC,  
857 PtA, and V1/V2 cortices respectively) and corresponding representative voltage traces  
858 for recorded type I and II claustrum neurons. Circuits tested: OFC > CL > OFC; OFC >  
859 CL > ACC; OFC > CL > pIPFC; OFC > CL > iIPFC; OFC > CL > RSC; OFC > CL > PtA;  
860 OFC > CL > V1/V2 (n=15 type I cells; n=15 type II cells each circuit). G) Diagram of *ex*  
861 *vivo* aINS trans-claustral circuits tested (projecting to ACC, pIPFC, iIPFC, OFC, RSC,  
862 PtA, and V1/V2 cortices respectively) and corresponding representative voltage traces  
863 for recorded type I and II claustrum neurons. Circuits tested: OFC > CL > OFC; OFC >  
864 CL > ACC; OFC > CL > pIPFC; OFC > CL > iIPFC; OFC > CL > RSC; OFC > CL > PtA;  
865 OFC > CL > V1/V2 (n=15 type I cells; n=15 type II cells each circuit). Horizontal scale  
866 bars: A) Top: 500 $\mu$ m Bottom: 200 $\mu$ m C-G) 100ms. Vertical scale bars: C-G): 40mV.

867 **Figure 4. Average area under the curve metric shows specificity of circuit**  
868 **strength based on claustrum neuron output target region.** A) Averaging the area  
869 under the curve of each voltage trace (for all light intensities) reveals differences in  
870 circuit strength across frontal trans-claustral circuits depending on type I and II  
871 claustrum projection neuron target (Kruskal Wallis test for multiple comparisons:  
872  $P < 0.0001$ ;  $n = 525$  type I cells and  $n = 525$  type II cells total). B-C) Clustered strong frontal  
873 cortico-claustrum-cortical circuits were detected by subgraph extraction (cluster marked in  
874 black) for type I and type II claustrum neuron subtypes. Type I: detected subgraph from  
875 ACC and pIPFC to pIPFC, PtA, and V1/V2 had high proportion of significant circuits.  
876 Type II: detected subgraph from ACC and pIPFC to ACC, pIPFC, PtA, V1/V2 had high  
877 proportion of significant circuits. Detected subgraphs  $P < 0.001$  under permutation test.

878 **Figure 5. Average action potentials per light pulse metric shows specificity of**  
879 **circuit strength based on claustrum neuron output target region and firing fidelity**  
880 **is neuron subtype specific.** A) Average action potentials per light pulse stimulation of  
881 each voltage trace (for all light intensities) reveals differences in circuit strength across  
882 frontal trans-claustral circuits depending on type I and II claustrum projection neuron  
883 target (Kruskal Wallis test for multiple comparisons:  $P < 0.0001$ ;  $n = 570$  type I cells and  
884  $n = 525$  type II cells total). B-C) Clustered strong frontal cortico-claustrum-cortical circuits  
885 were detected by subgraph extraction (cluster marked in black) for type I and type II  
886 claustrum neuron subtypes. Type I: detected subgraph from ACC and pIPFC to PtA and  
887 V1/V2 had high proportion of significant circuits. Type II: detected subgraph from ACC  
888 and pIPFC to ACC, pIPFC, PtA, V1/V2 had high proportion of significant circuits.  
889 Detected subgraphs  $P < 0.001$  under permutation test. D) Select fronto-cortico-claustrum-



890 cortical circuits preferentially activate type II neurons compared to type I neurons: ACC  
891 > CL > ACC (Wilcoxon rank sum test:  $P=0.027$ ); ACC > CL > pIPFC ( $P<0.0001$ ); ACC >  
892 CL > iIPFC ( $P=0.003$ ); ACC > CL > OFC ( $P=0.006$ ); ACC > CL > V1/V2 ( $P=0.016$ ); ACC  
893 > CL > PtA ( $P=0.009$ ); pIPFC > CL > V1/V2 ( $P=0.041$ ); iIPFC > CL > iIPFC ( $P=0.016$ );  
894 iIPFC > CL > V1/V2 ( $P=0.215$ ); and OFC > CL > RSC ( $P=0.015$ ).  $n=15$  cells in each  
895 circuit for each subtype. Error bars: Standard Error.

896 **Figure S1. Structural connectivity of putative frontal cortico-claustral-cortical**  
897 **loops**

898 A-E) Top panels: representative photomicrographs of anterograde eYFP virus injection  
899 sites in the A) ACC, B) pIPFC, C) iIPFC, D) OFC, and E) aINS. Bottom panels:  
900 representative photomicrographs of anterograde terminal expression in the claustrum  
901 from respective frontal regions. Structural inputs were strongest from the ACC and  
902 pIPFC with moderate inputs from the OFC. Very weak inputs were observed from the  
903 aINS based on anterograde viral expression in the claustrum. F-K) Top panels:  
904 representative photomicrographs of retrograde td-Tomato virus injection sites in the  
905 ACC (F), pIPFC (G), OFC (H), aINS (I), parietal association cortex (PtA) (J), and visual  
906 cortex (V1/V2) (K). Bottom panels: representative photomicrographs of retrograde td-  
907 Tomato expression in the claustrum. Highest cell body density was found in ACC and  
908 pIPFC cases followed by dense expression of claustrum cell projection neurons  
909 targeting the OFC, PtA and V1/V2 cortices. Very few to no claustrum neurons project to  
910 the aINS based on lack of retrograde labeling. ( $n=3$  per circuit case). Horizontal scale  
911 bars: B-K)  $500\mu\text{m}$ .

912 **Figure S2. Reversal potential of GABA is lower than the average resting**  
913 **membrane potential for both claustrum projection neuron subtypes. A)**  
914 Input/output curve across multiple membrane potentials reveals a reversal potential of  
915 GABARs to be approximately -75mV for type I and B) type II neurons. C) There is no  
916 significant difference between type I and II GABAR reversal potential. Horizontal scale  
917 bars: A-B) 20ms. Vertical scale bars: A-B) 200pA.

918 **Figure S3. *Ex vivo* circuit-mapping average area under the curve and number of**  
919 **action potentials per light pulse raw data values table. A)** Average area under the  
920 curve values (left) and actional potentials per light pulse values (right) for each light  
921 intensity tested (0-3mW) of all type I claustrum neurons (n=525 cells). B) Average area  
922 under the curve values (left) and actional potentials per light pulse values (right) for  
923 each light intensity tested (0-3mW) of all type II claustrum neurons (n=525 cells).  
924 Average action potentials per light stimulation values were used to determine circuit  
925 strength classifications based on action potential firing rates. Error shown is in standard  
926 error. Units: \*\* = mV x msec.

927 **Figure S4. P-value matrices for average area under the curve and action**  
928 **potentials per light pulse multiple comparisons test show specificity in claustrum**  
929 **neuron activation depending on projection output target region. A-B)** Kruskal  
930 Wallis test for multiple comparisons P-value matrix for average area under the curve for  
931 type I (A) and type II (B) trans-claustral circuits. C-D) Kruskal Wallis test for multiple  
932 comparisons P-value matrix for average action potentials per light pulse for type I (C)  
933 and type II (D) trans-claustral circuits.

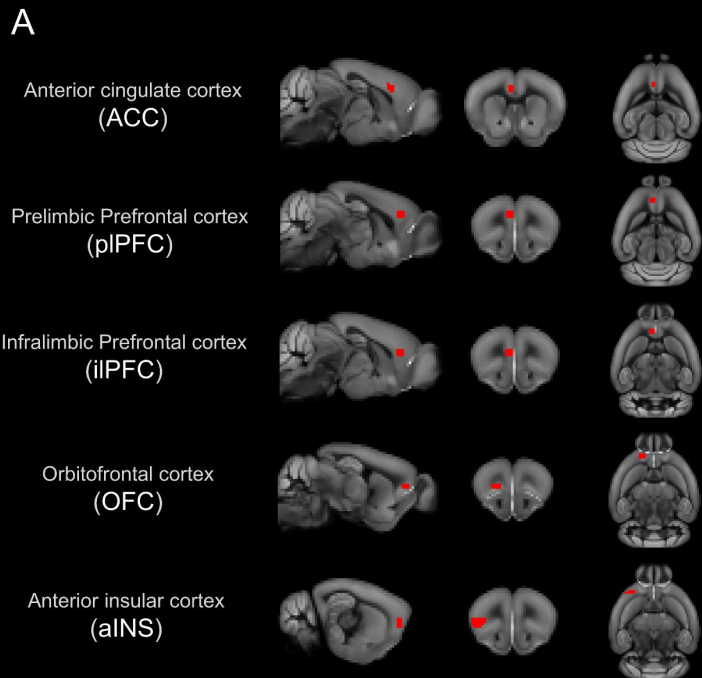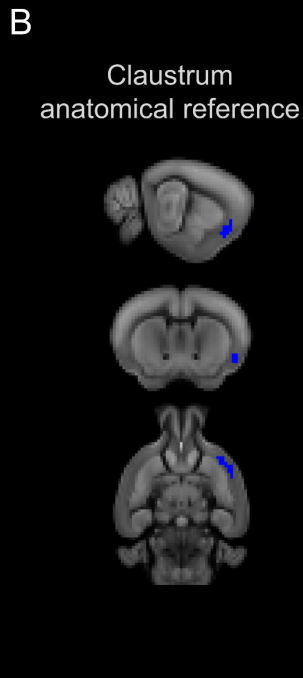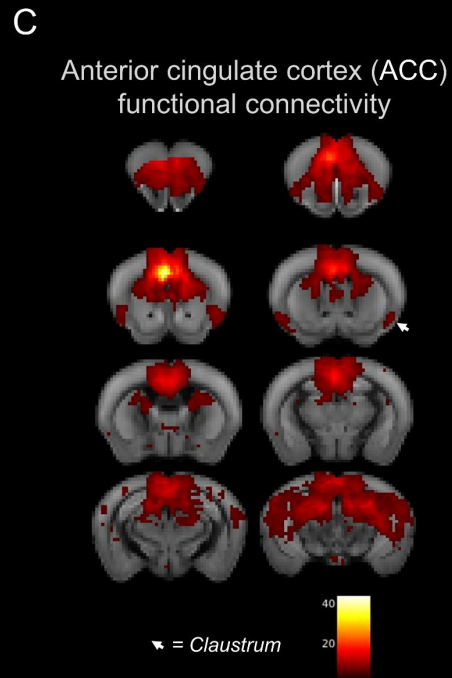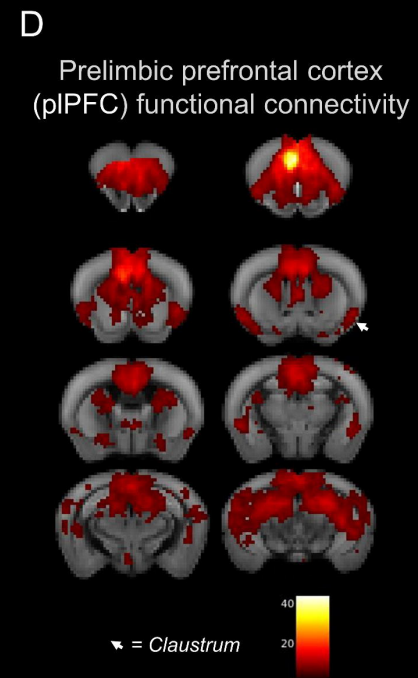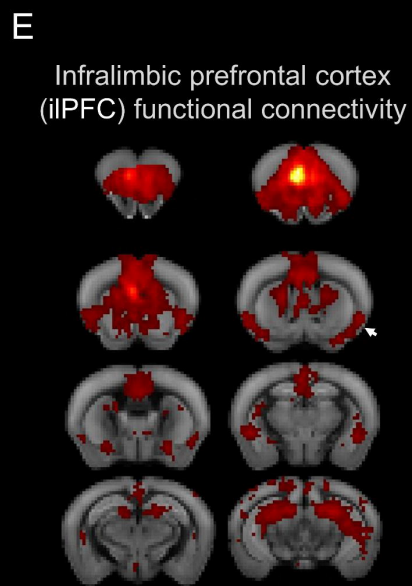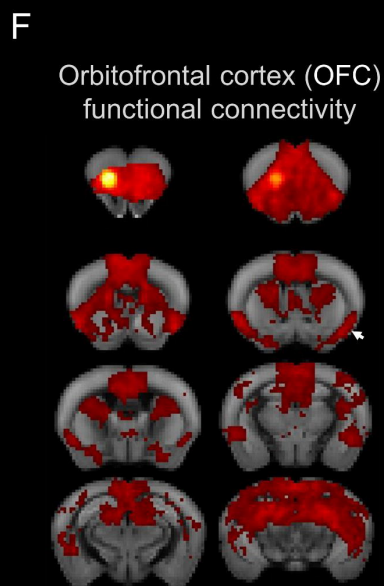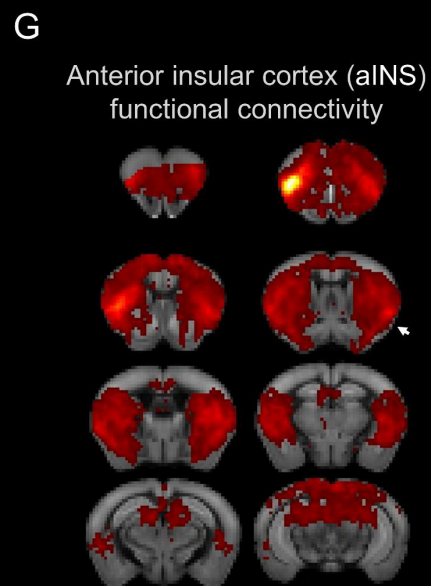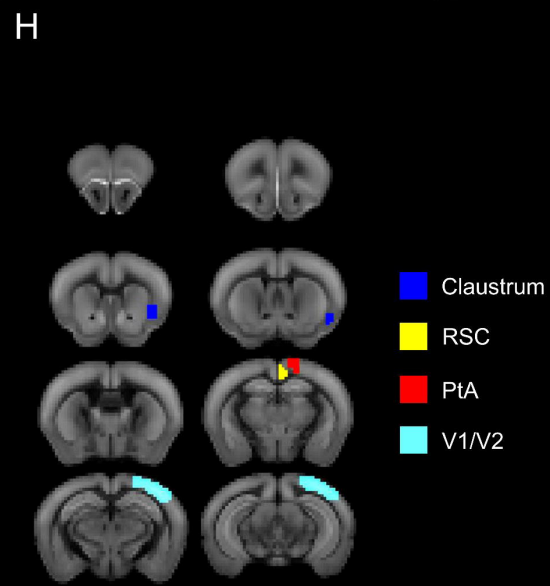

A

Type I

bioRxiv preprint doi: <https://doi.org/10.1101/2022.03.31.486634>; this version posted April 1, 2022. The copyright holder for this preprint (which was not certified by peer review) is the author/funder. All rights reserved. No reuse allowed without permission.

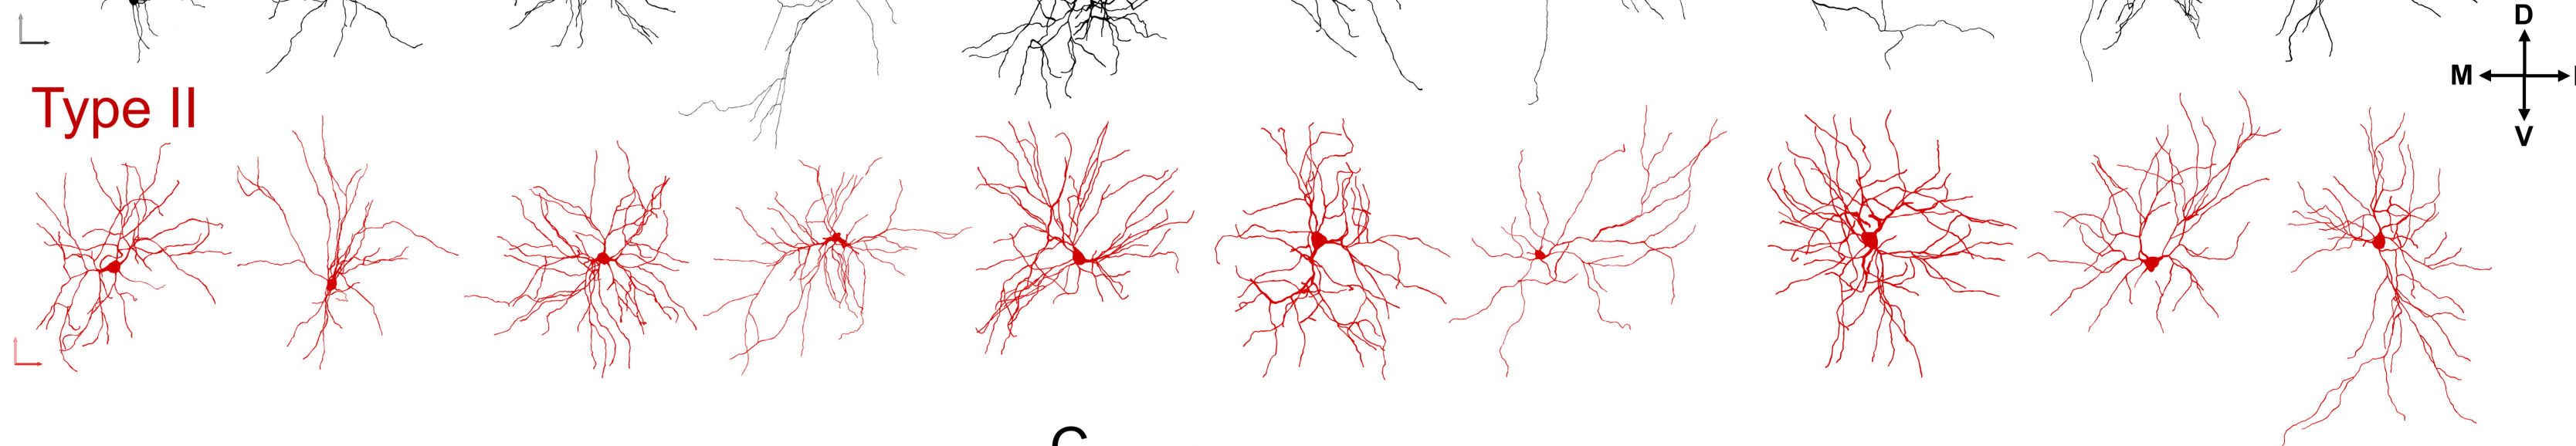

Type II

B

Type I

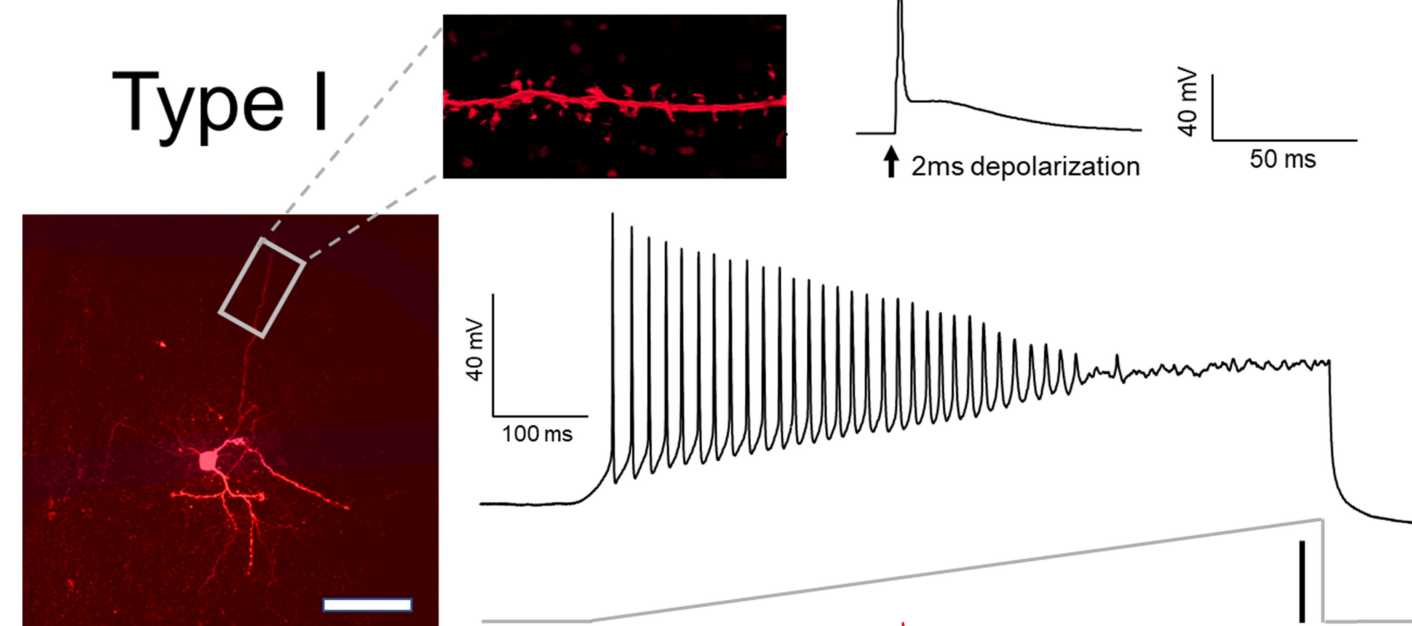

Type II

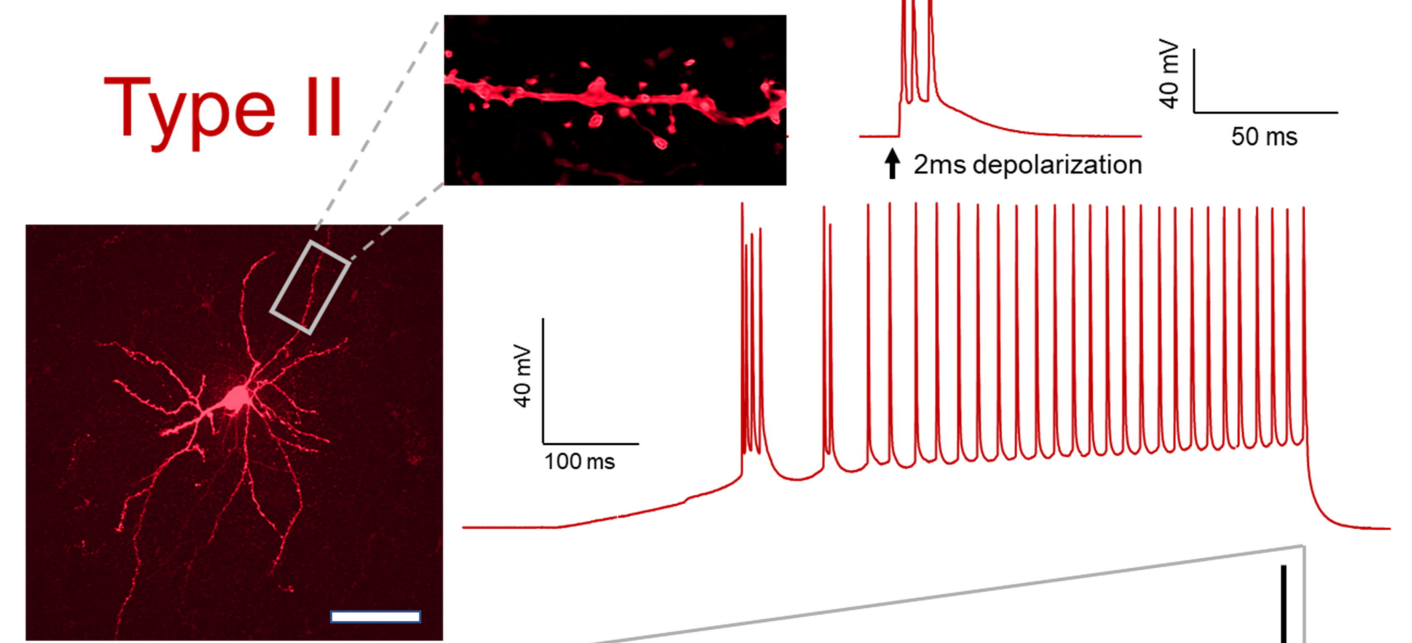

C

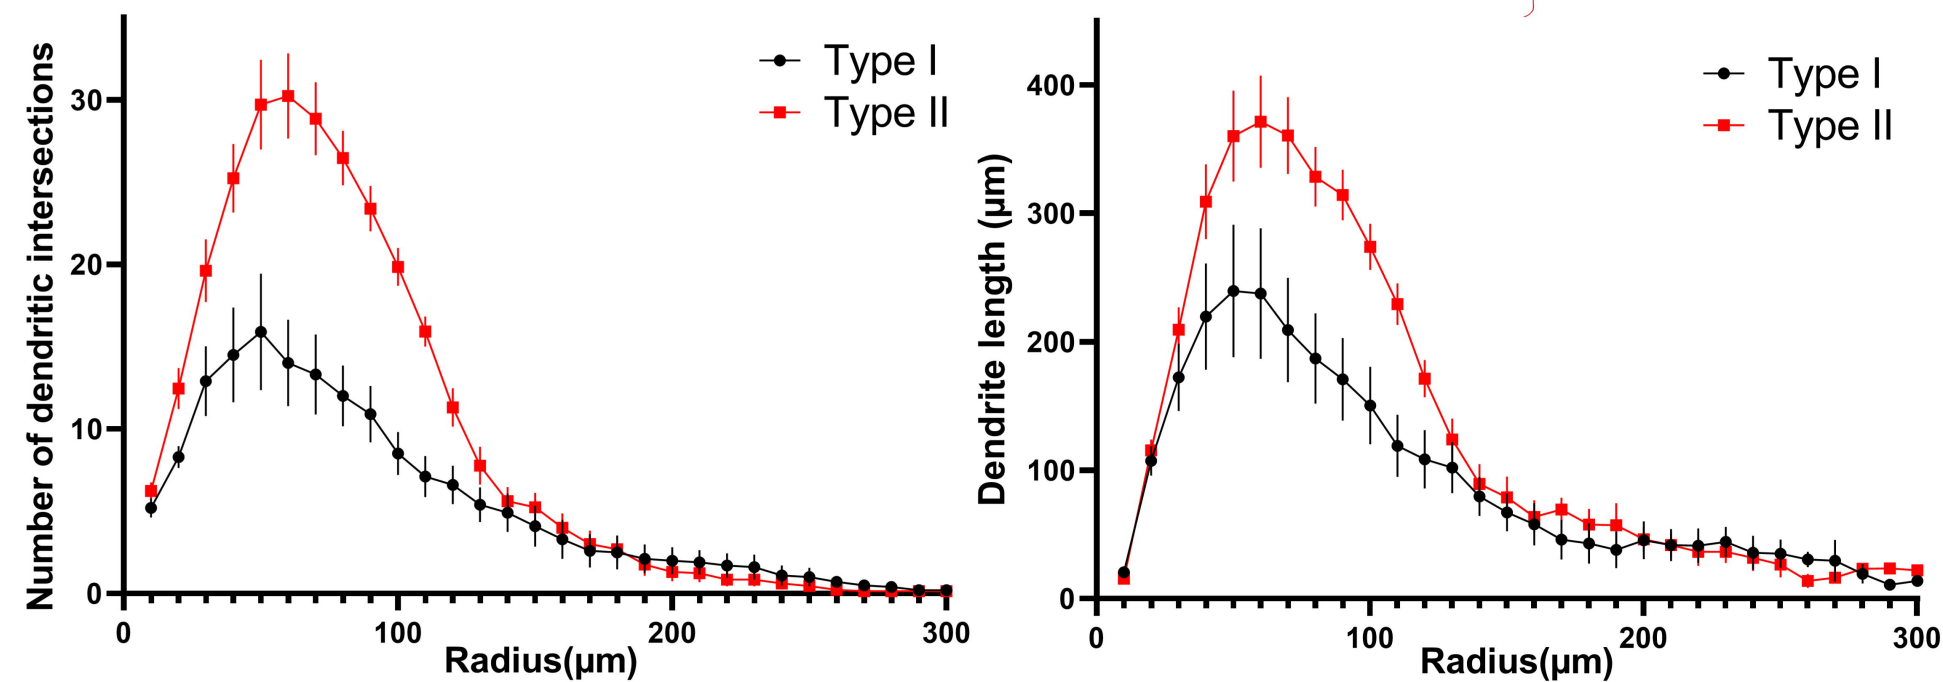

D

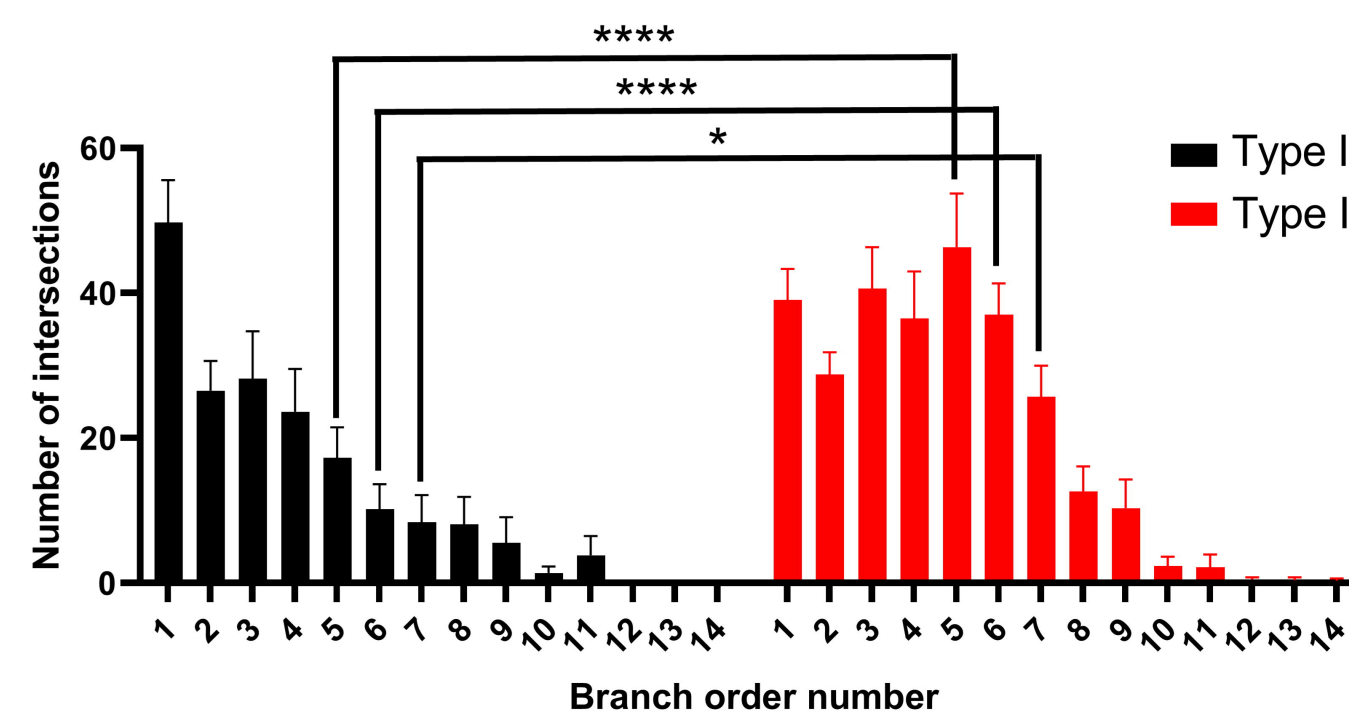

E

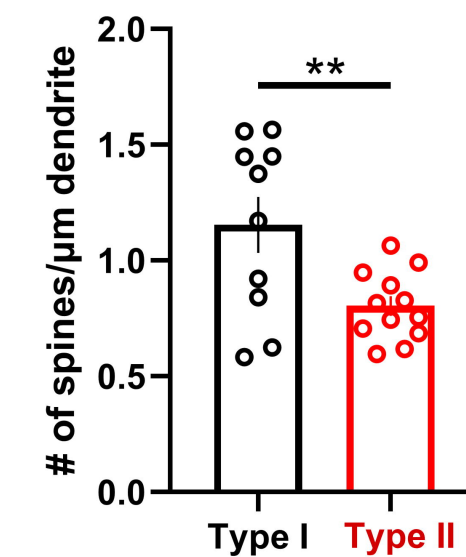

A

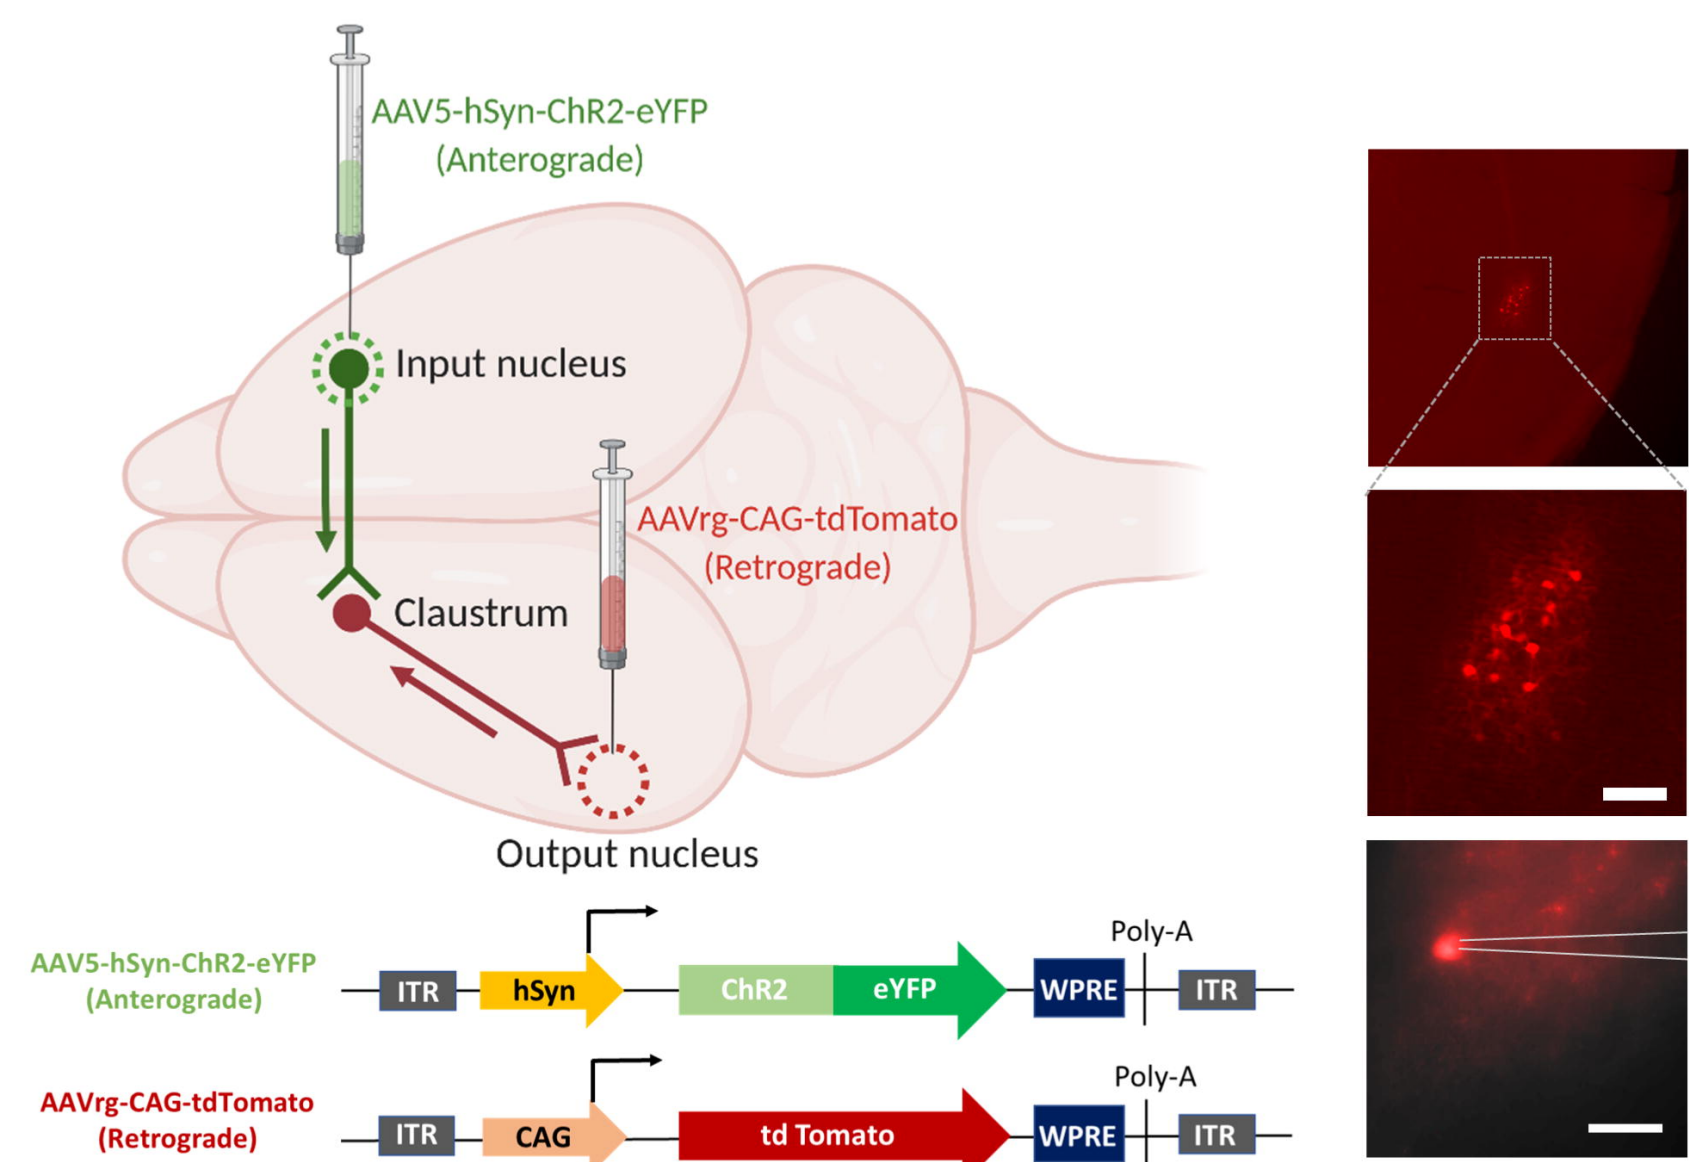

B

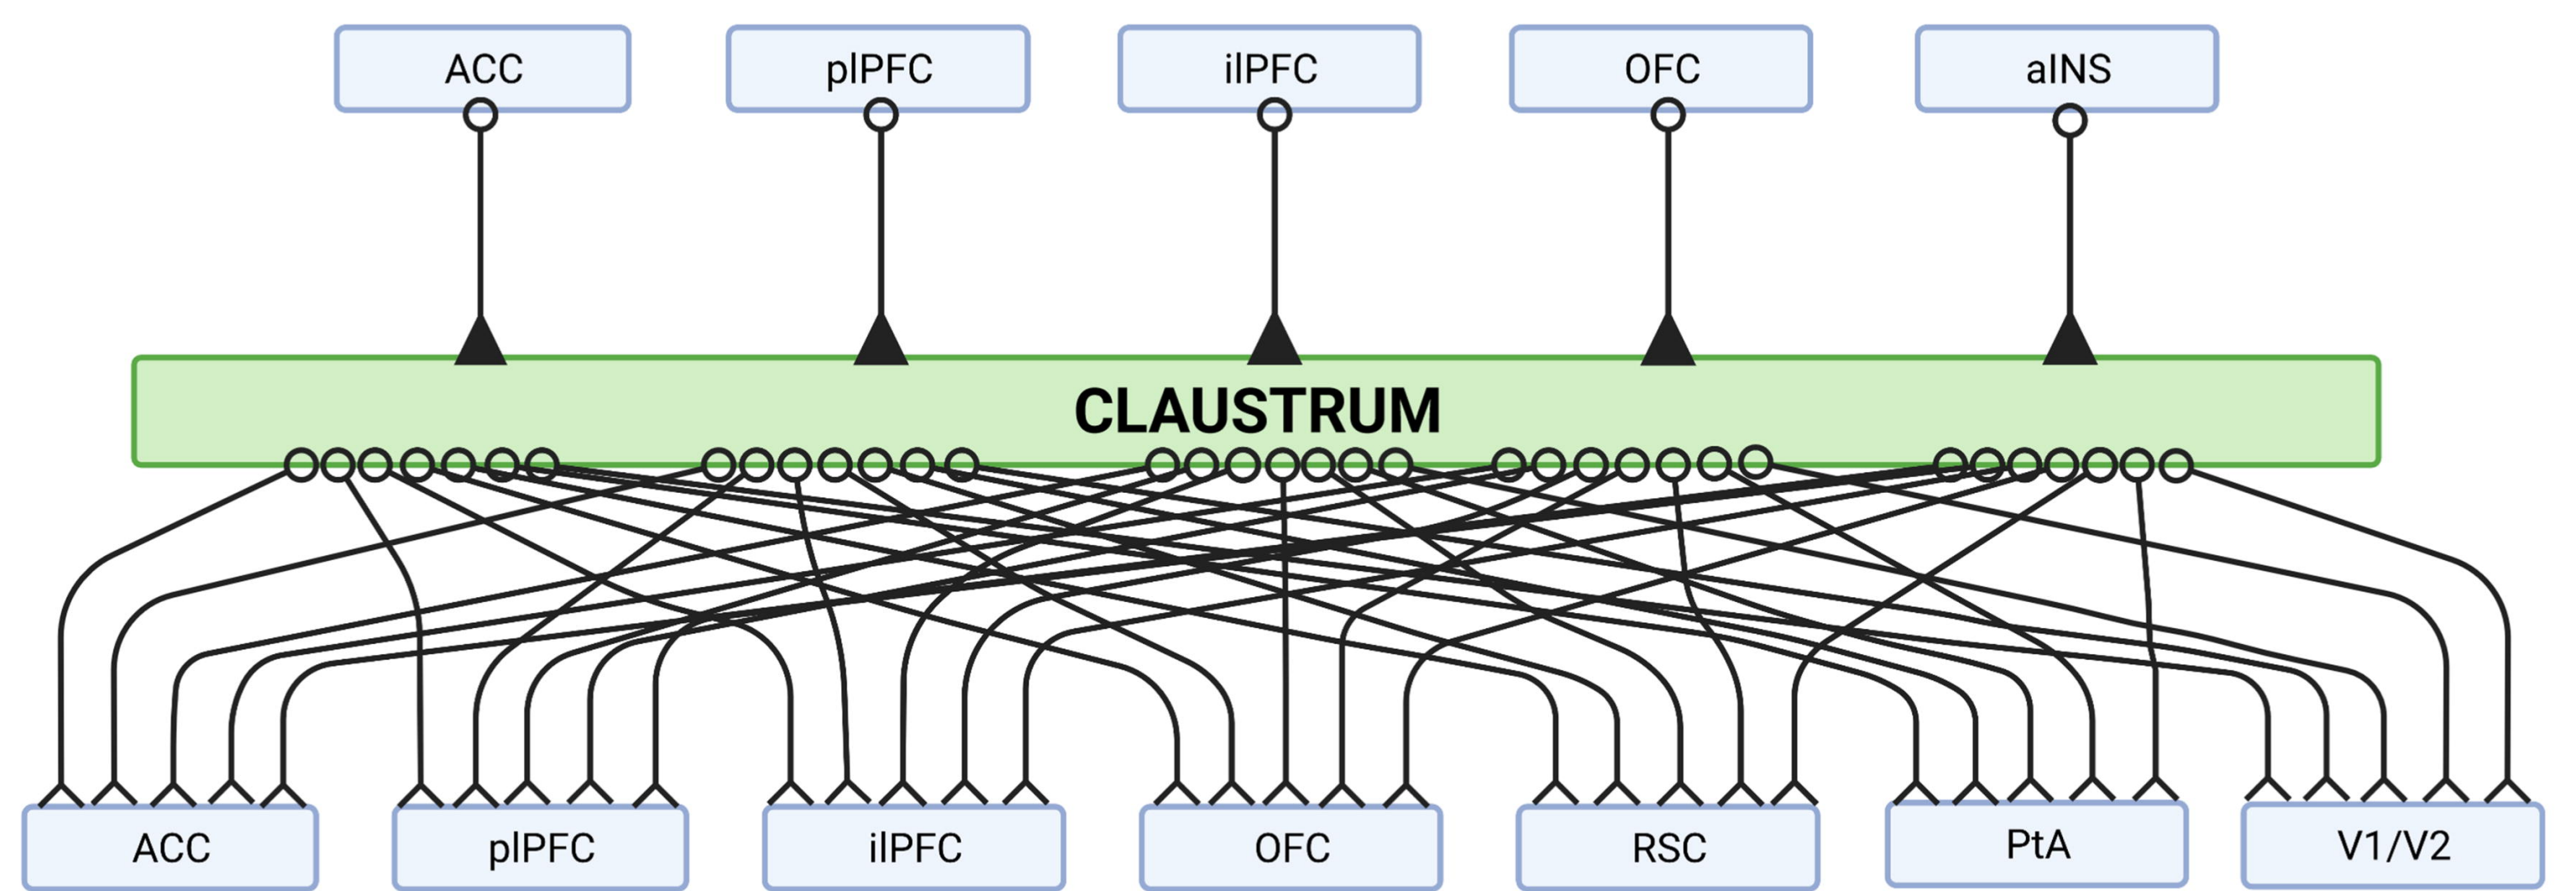

C

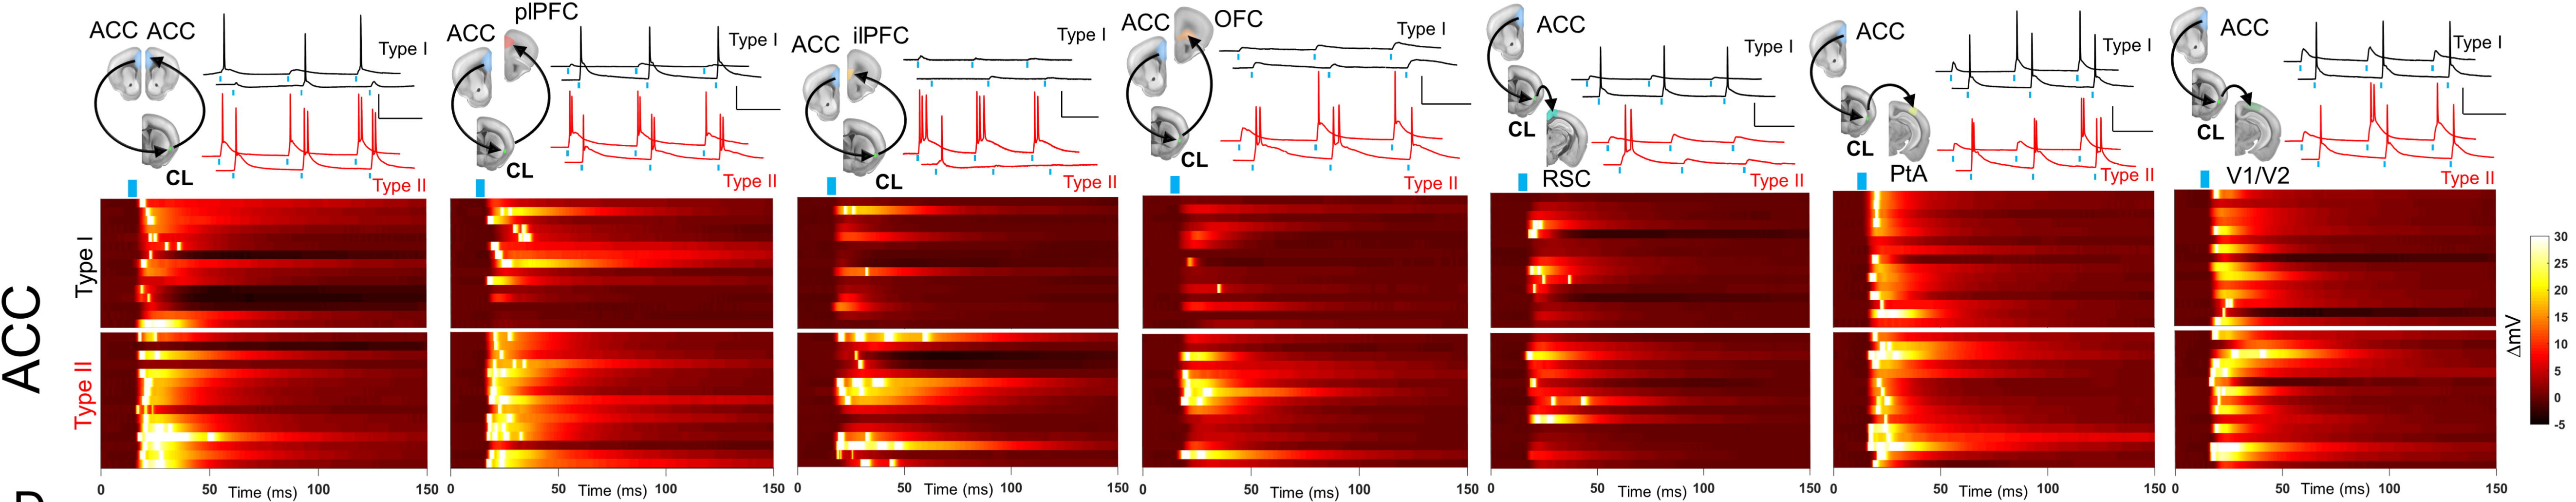

D

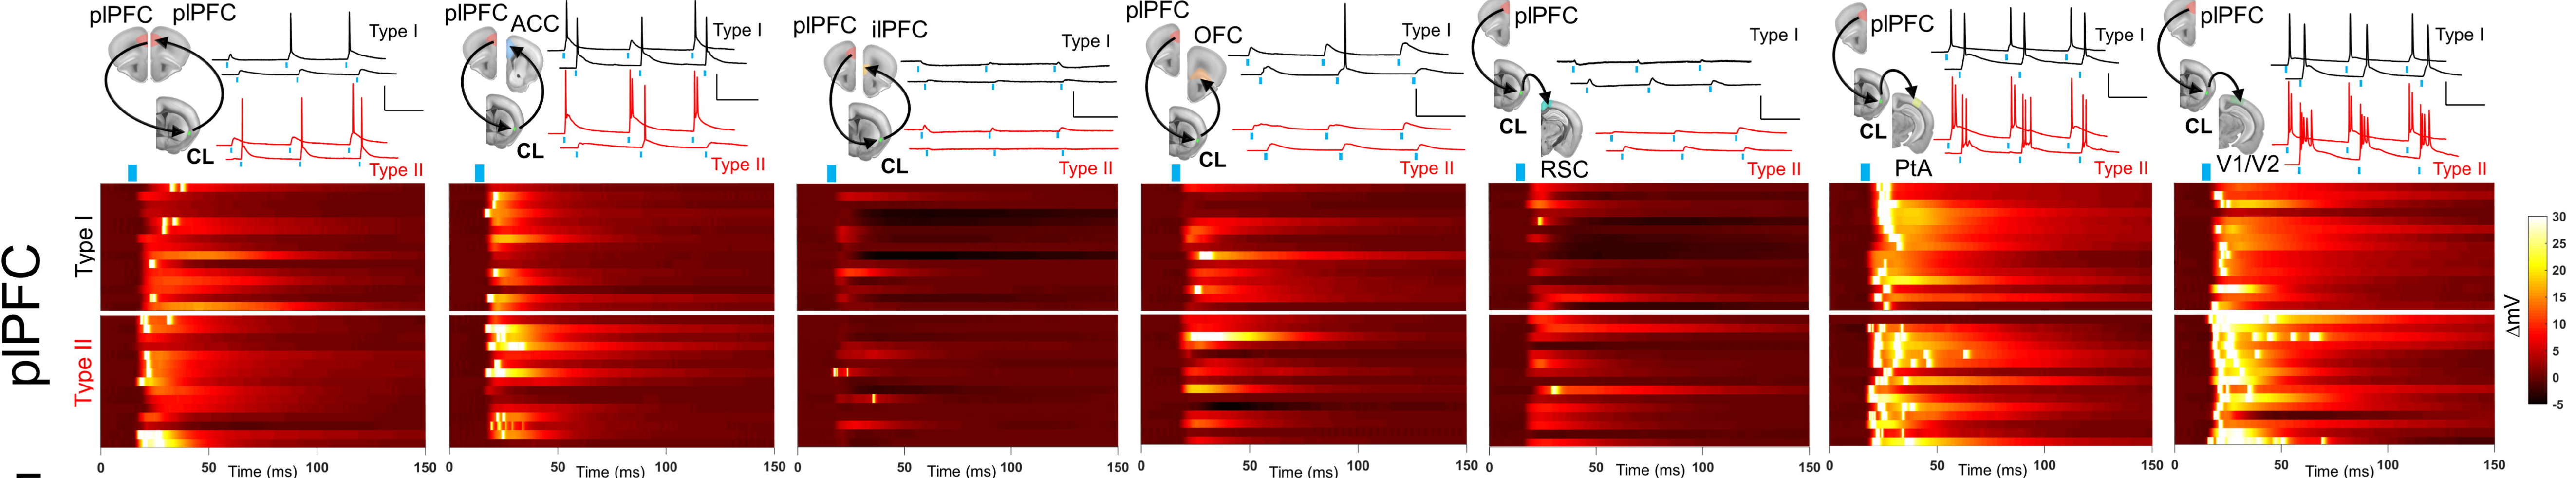

E

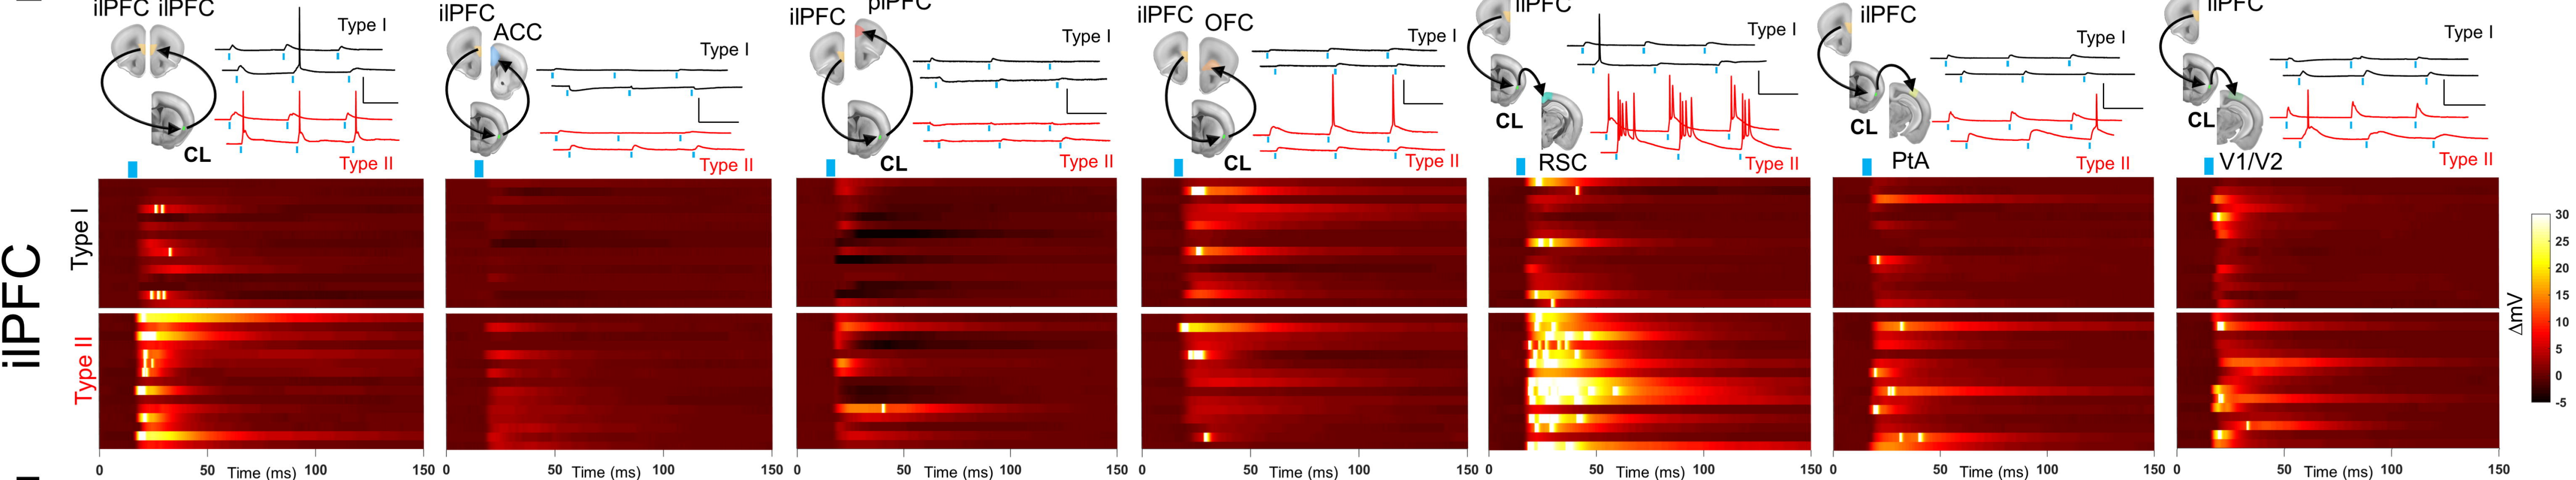

F

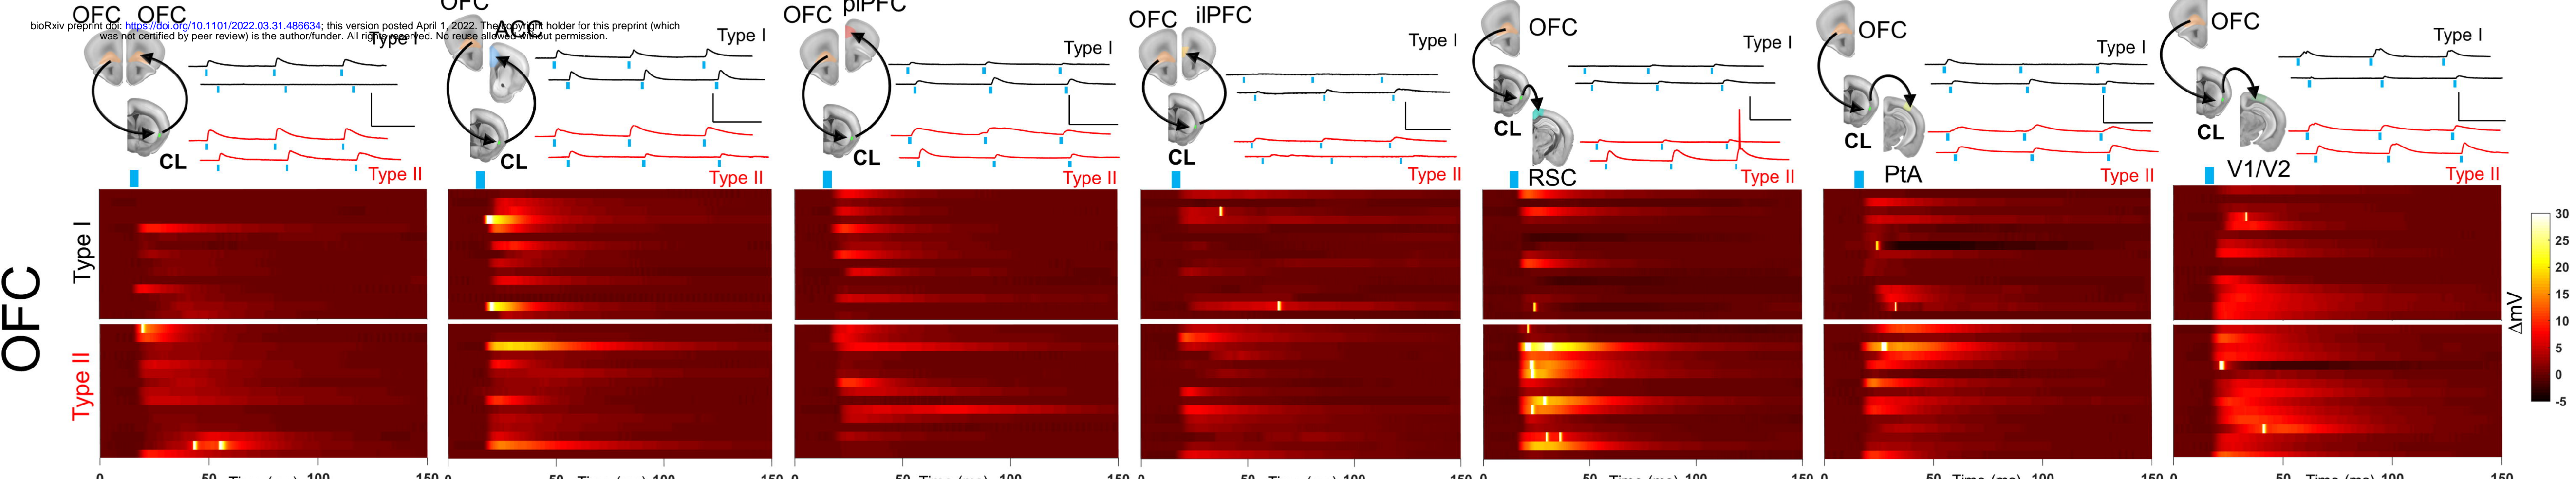

G

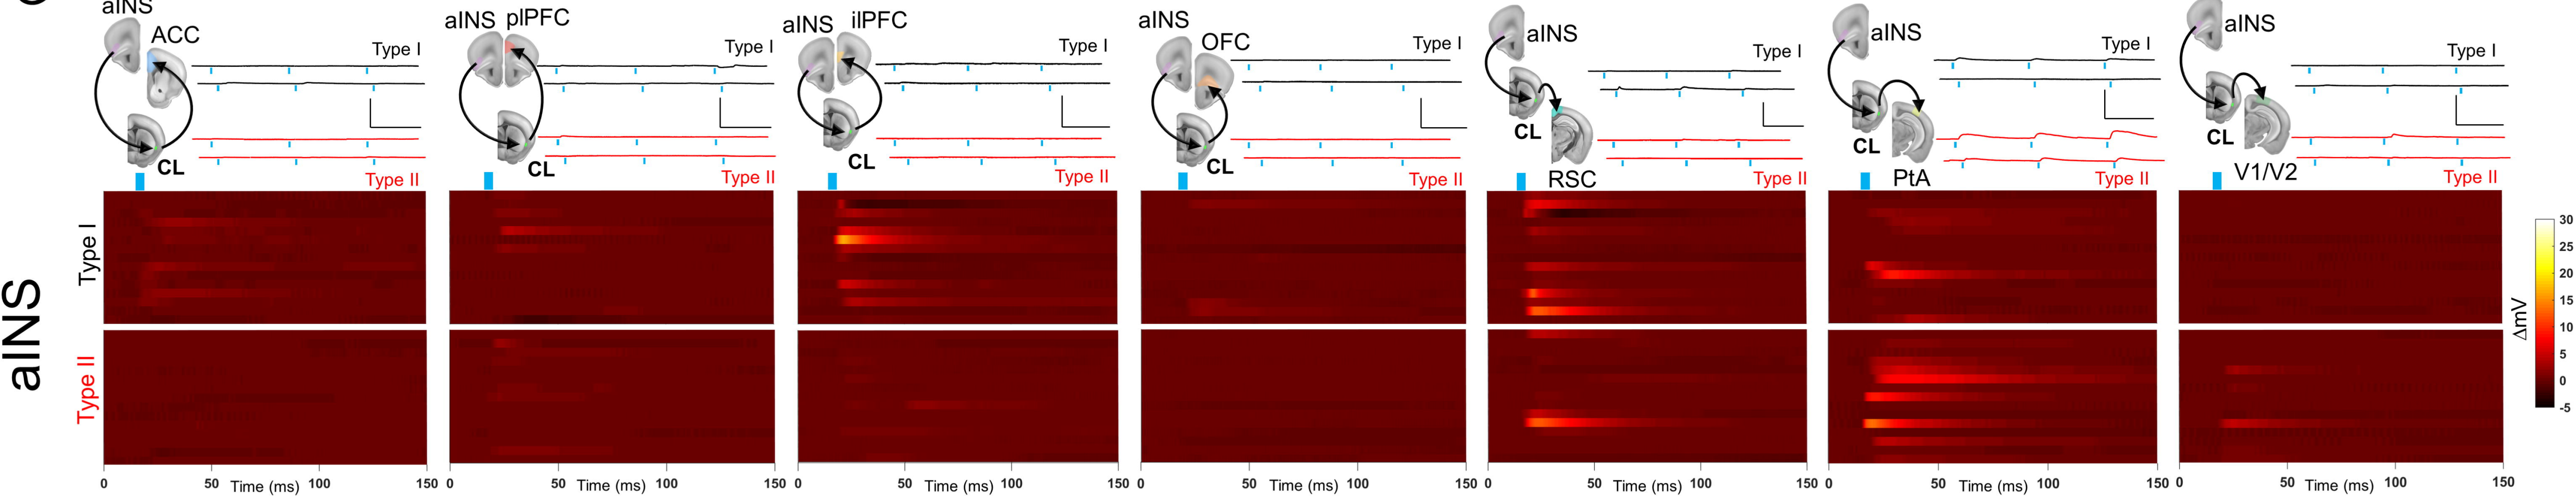

A

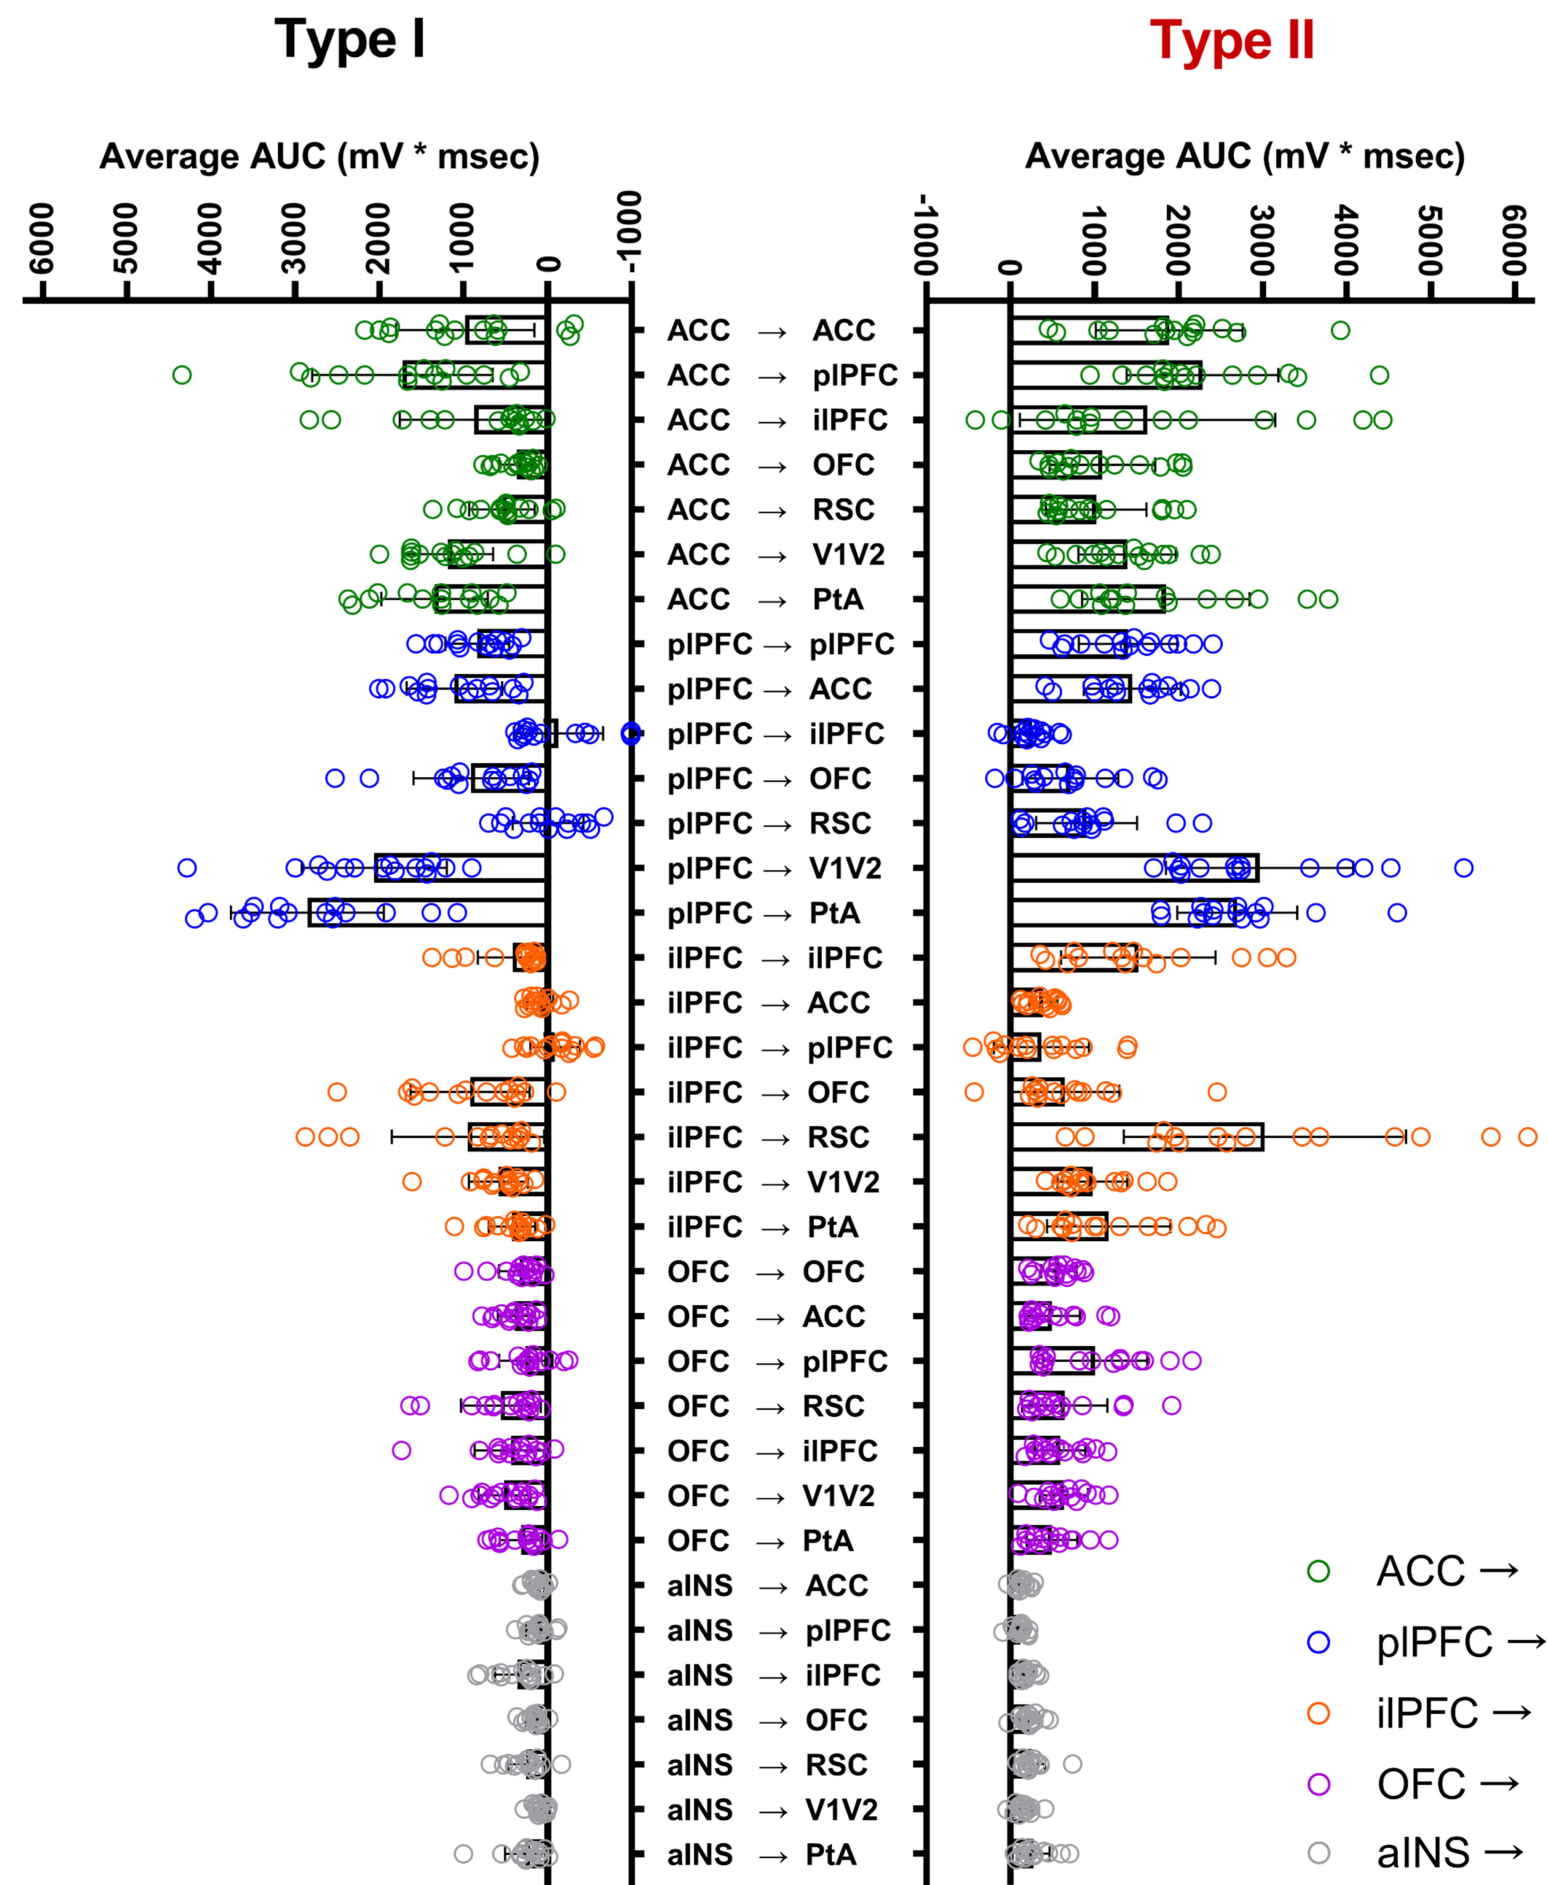

B

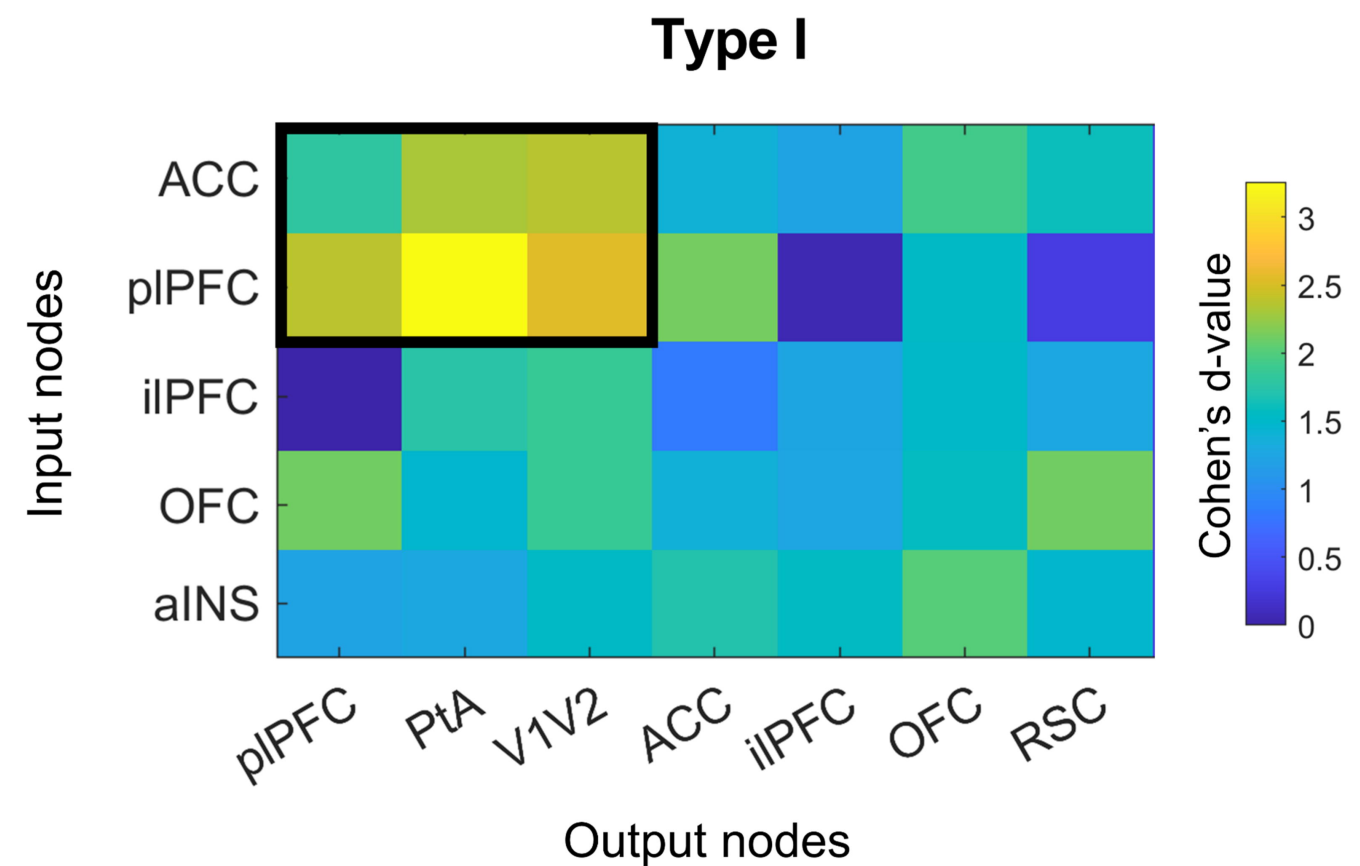

C

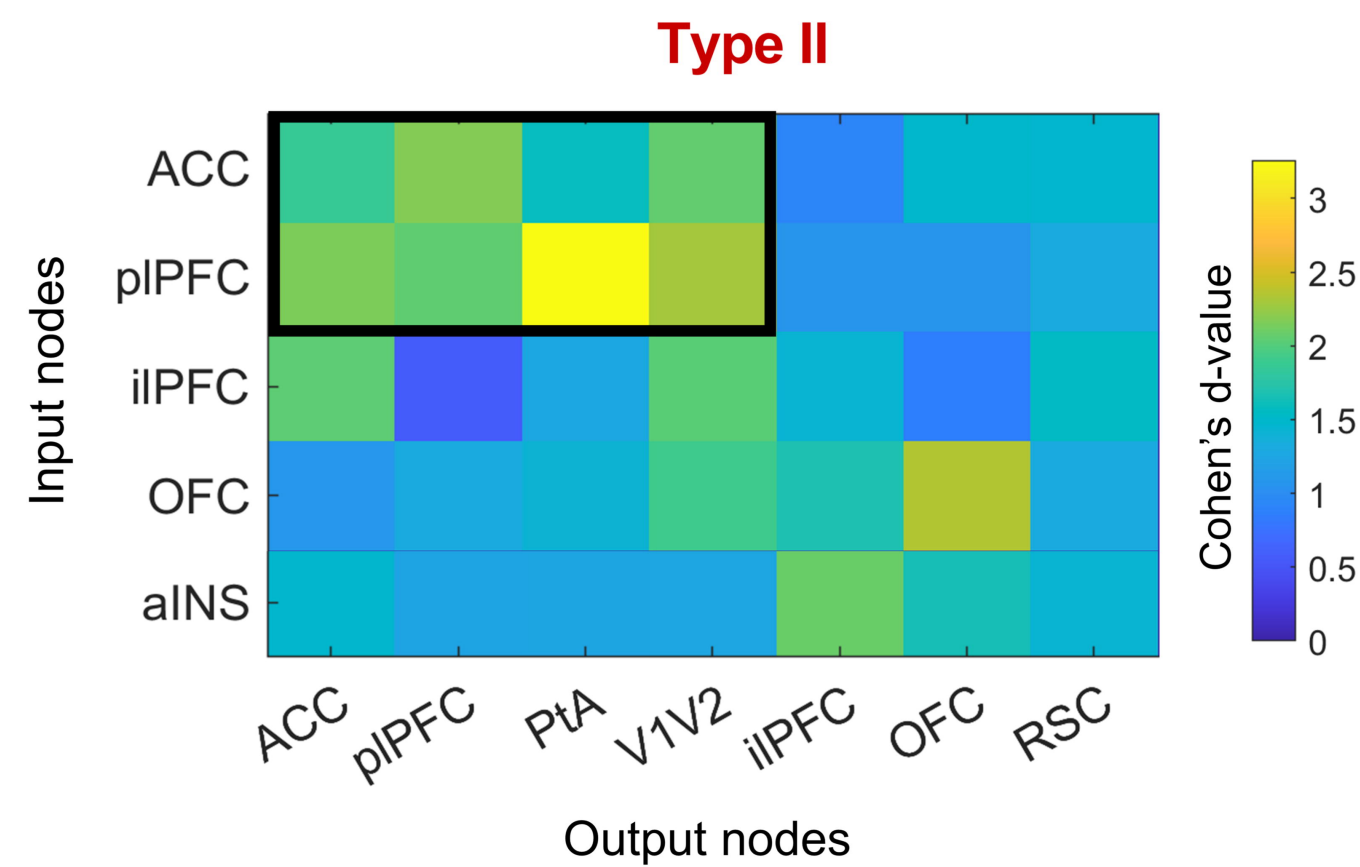

A

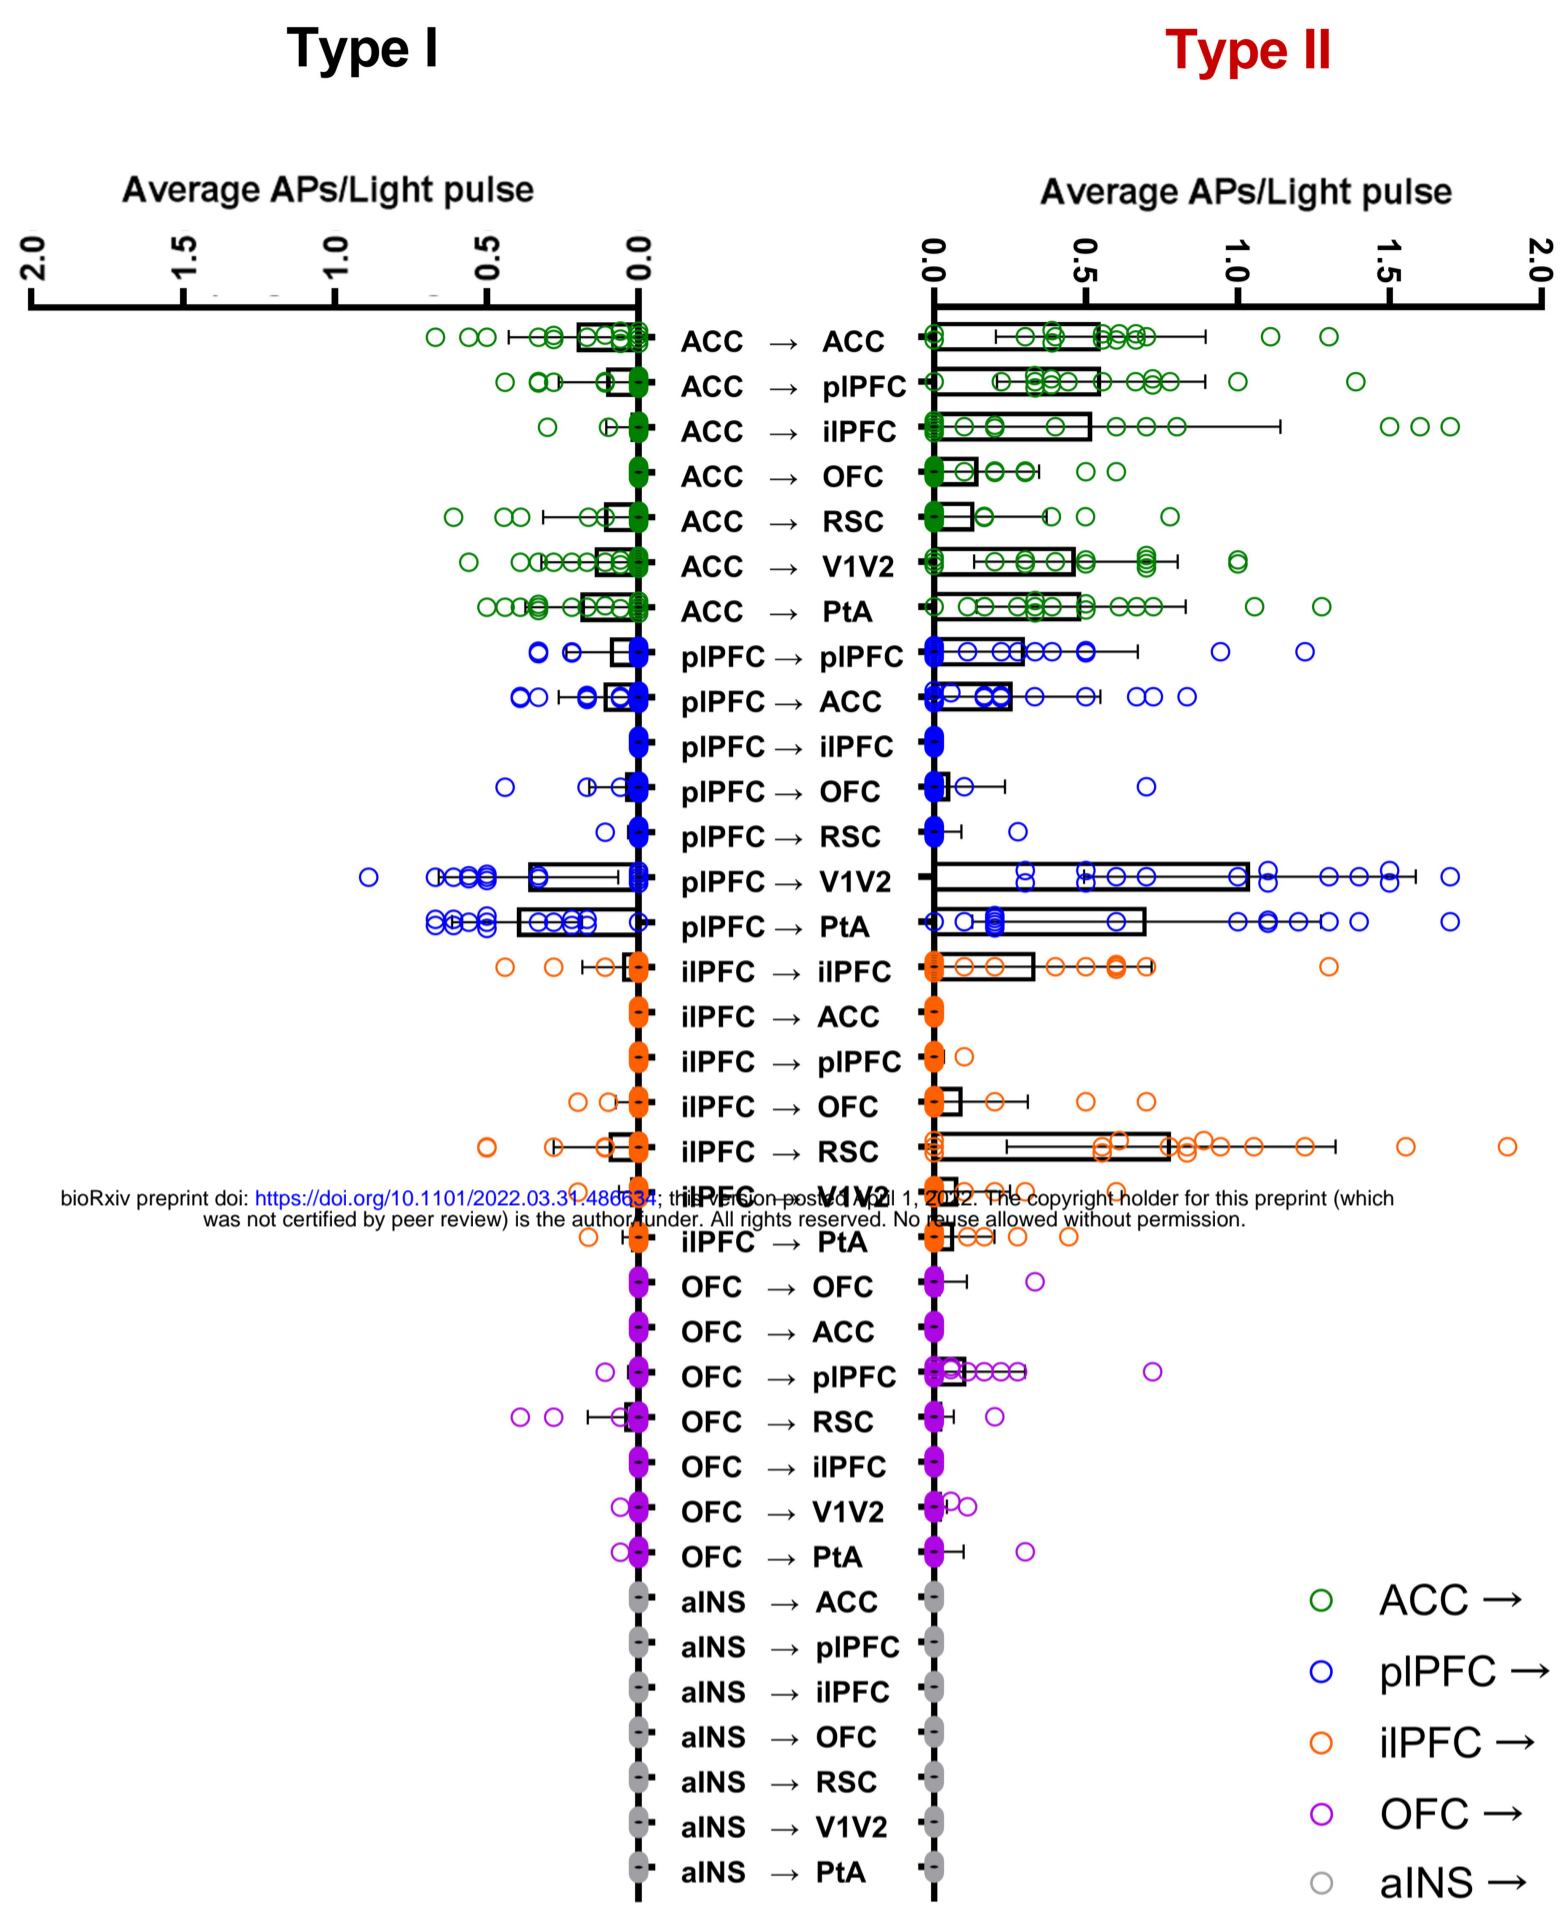

B

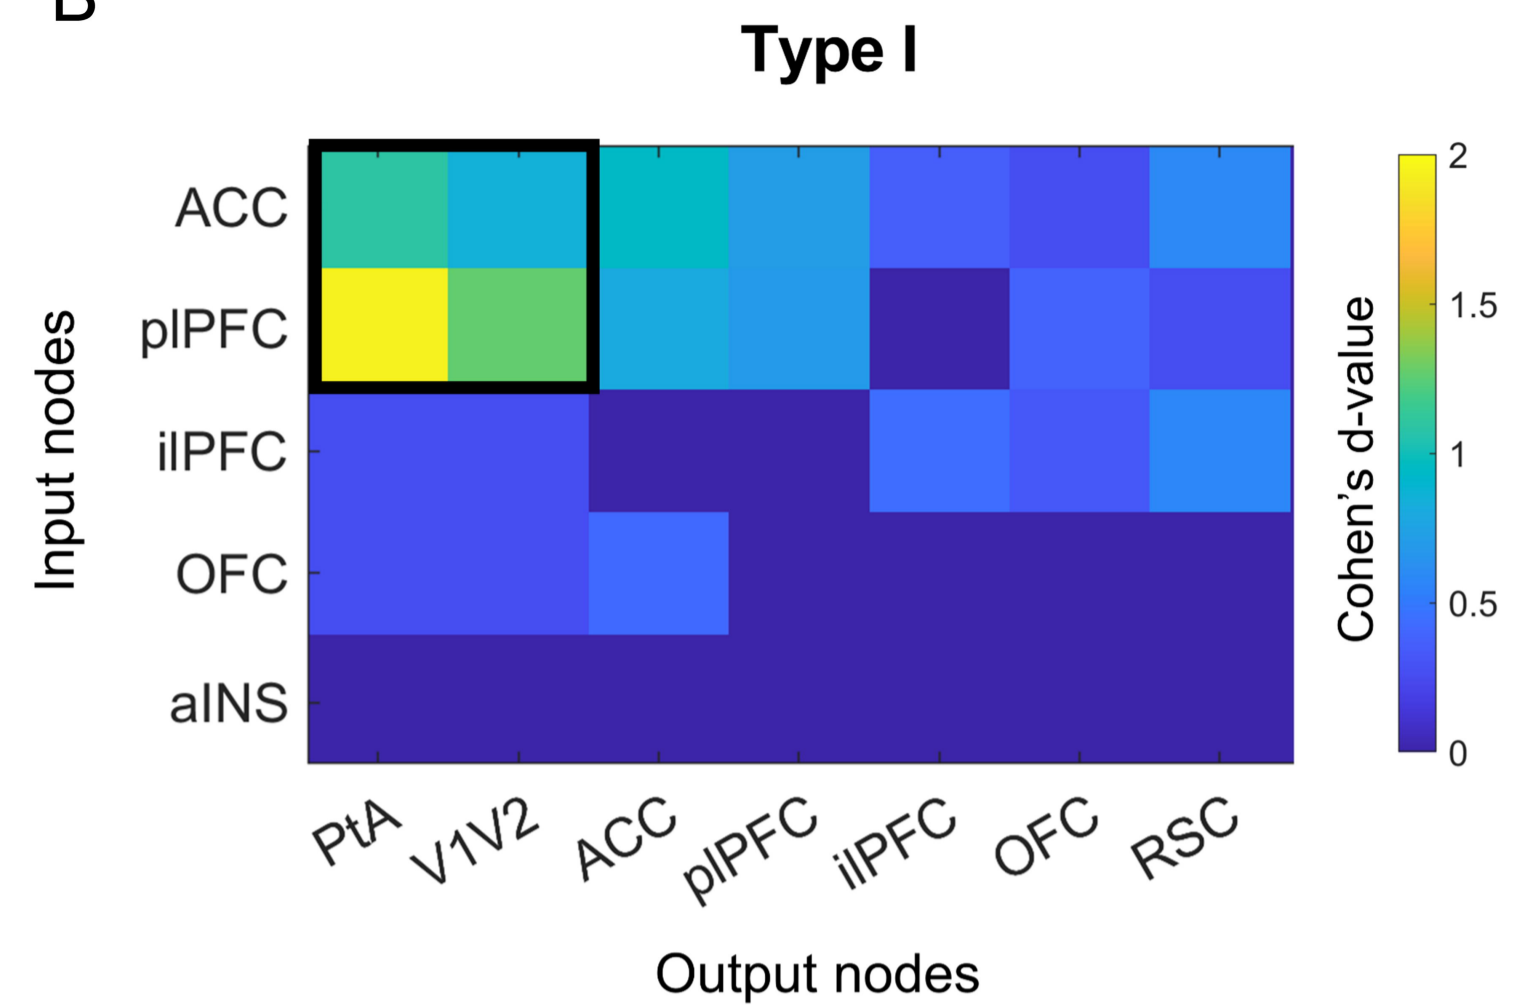

C

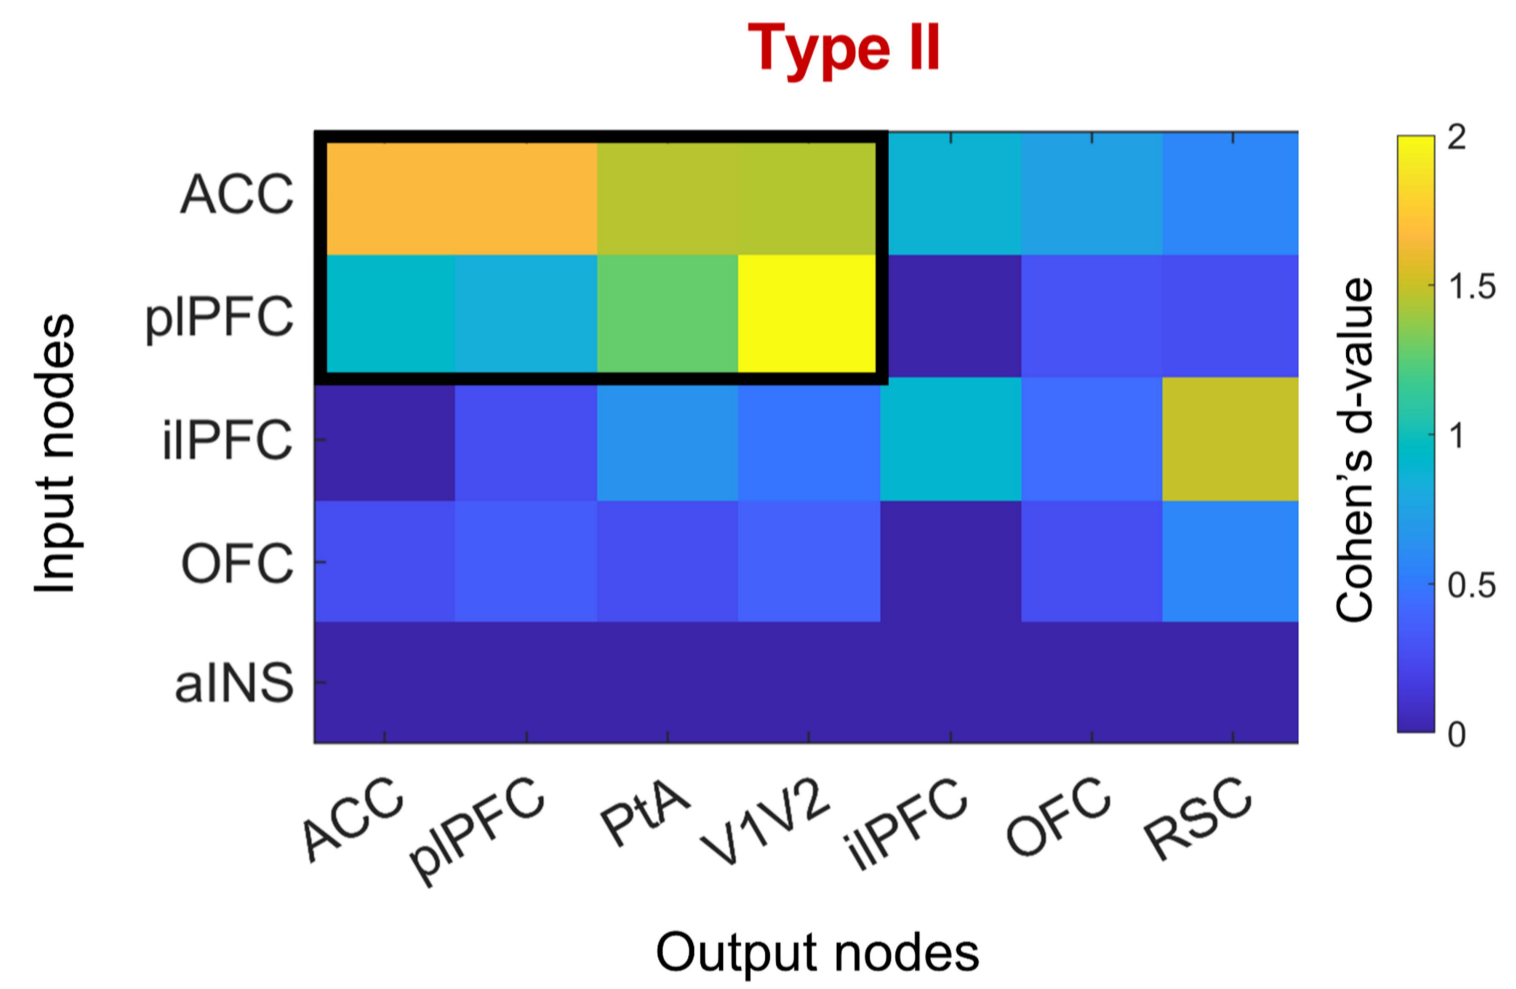

D

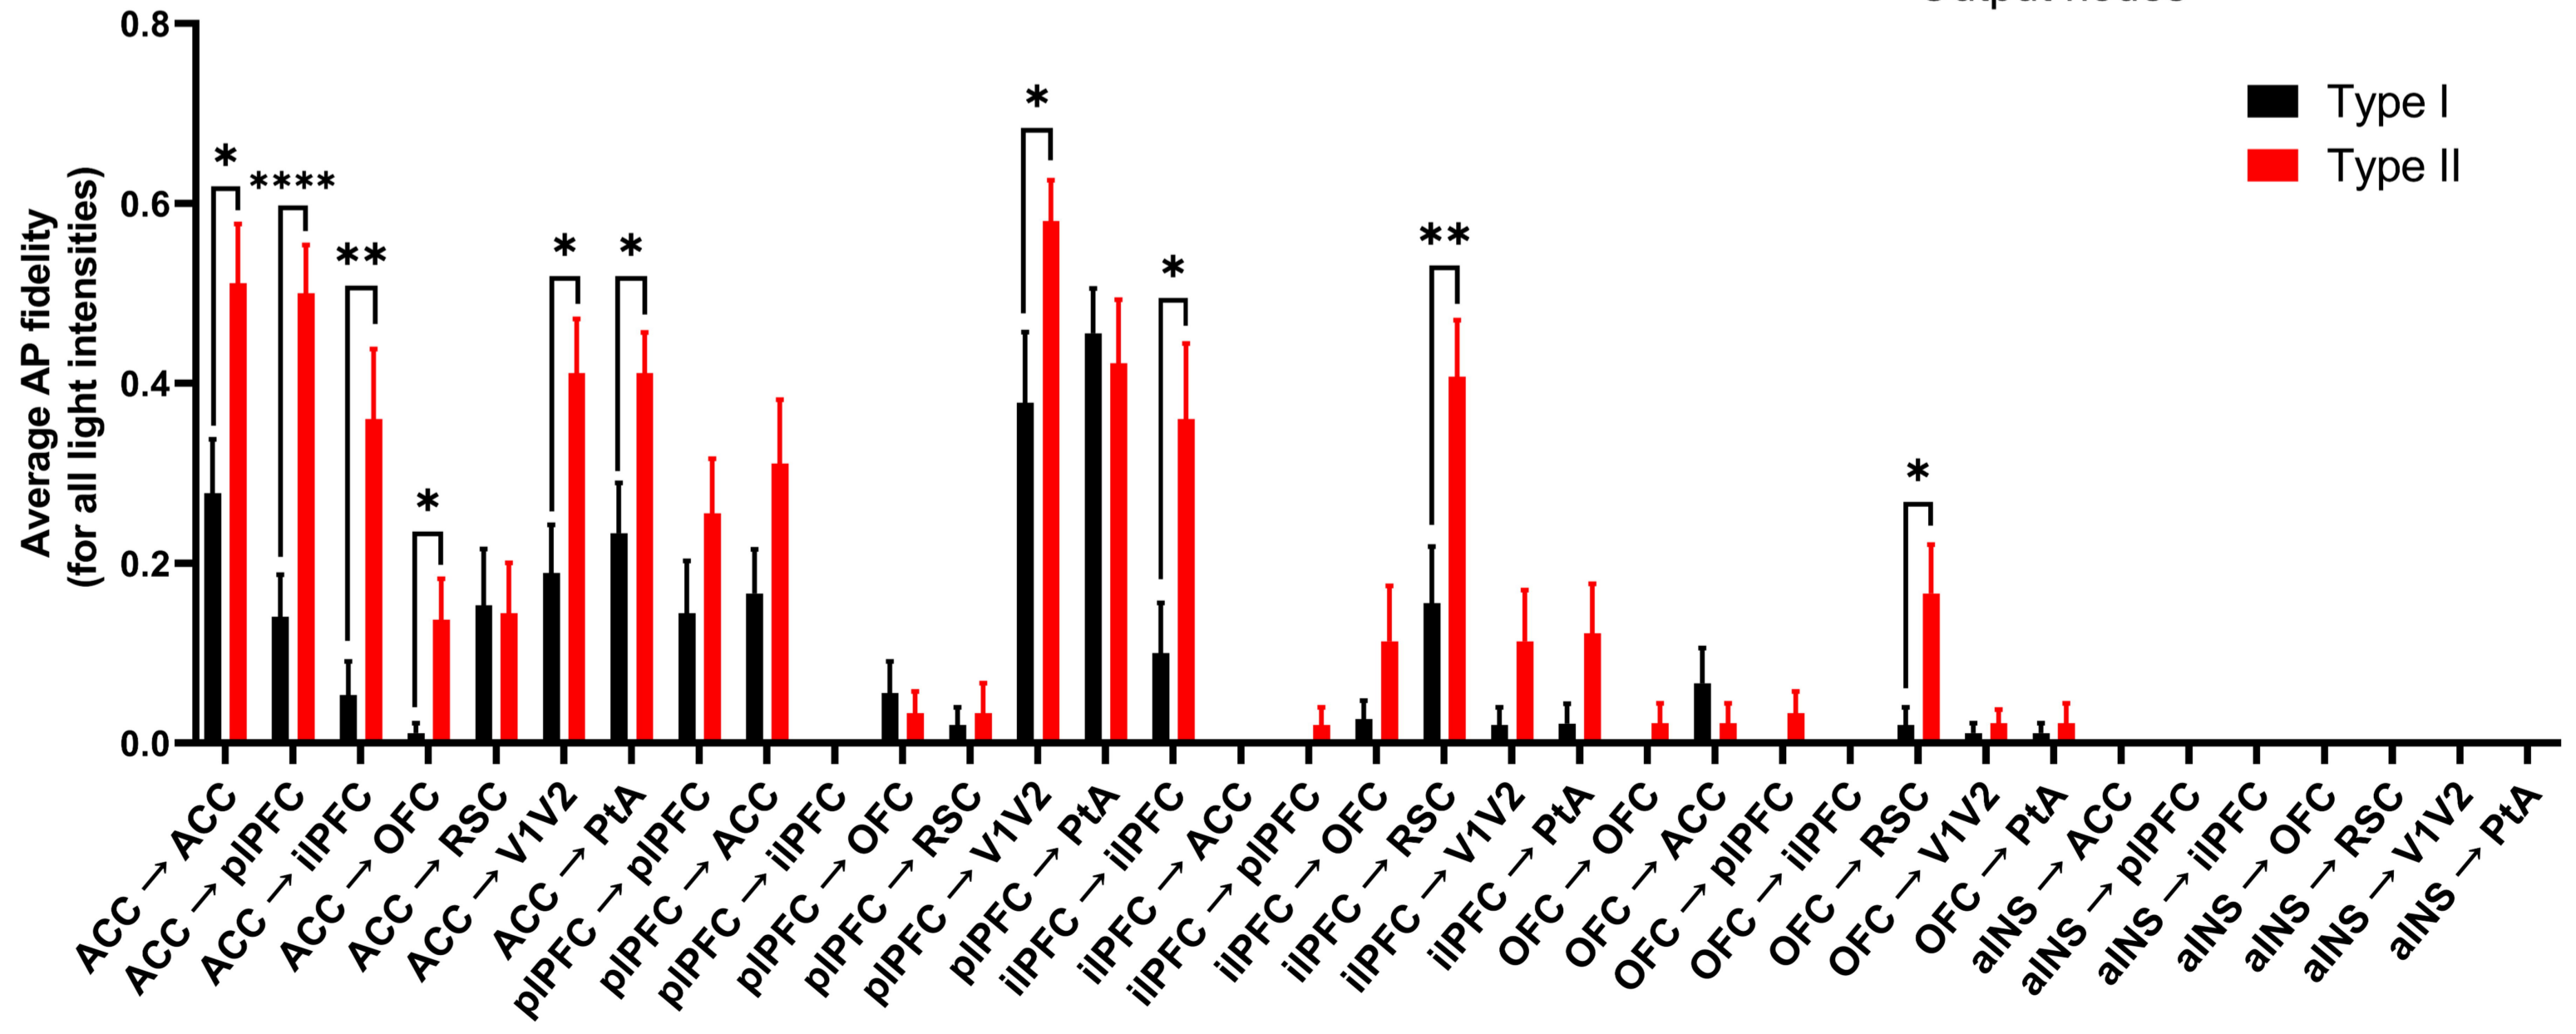

Source: https://www.biorxiv.org/content/10.1101/2022.03.31.486634v1.full.pdf
